# Supplementary material for: Signaling pathways as linear transmitters
Source: eLife journal article supplement (doi:10.7554/elife.33617), 2018-09-17
Supplement: supp [file elife-33617-supp-v2.zip]

Archive with 19 entries (19 files):
- elife_poa_e33617_Figure_3_figure_supplement_3.jpg
- elife_poa_e33617_Figure_3_figure_supplement_2.jpg
- elife_poa_e33617_Figure_3_figure_supplement_4.jpg
- elife_poa_e33617_Figure_3_figure_supplement_1.jpg
- elife_poa_e33617_Figure_3_figure_supplement_8.jpg
- elife_poa_e33617_Figure_2_figure_supplement_6.jpg
- elife_poa_e33617_Figure_2_source_code_1.zip
- elife_poa_e33617_Figure_2_figure_supplement_3.jpg
- elife_poa_e33617_Figure_2_figure_supplement_1.jpg
- elife_poa_e33617_Figure_3_source_data_1.zip
- elife_poa_e33617_Figure_3_figure_supplement_9.jpg
- elife_poa_e33617_Figure_2_figure_supplement_5.jpg
- elife_poa_e33617_Figure_2_figure_supplement_4.jpg
- elife_poa_e33617_Figure_3_figure_supplement_6.jpg
- elife_poa_e33617_Figure_2_figure_supplement_7.jpg
- elife_poa_e33617_Figure_3_figure_supplement_7.jpg
- elife_poa_e33617_Figure_3_figure_supplement_5.jpg
- elife_poa_e33617_Transparent_Reporting_File.pdf
- elife_poa_e33617_Figure_2_figure_supplement_2.jpg
