# Supplementary material for: Signaling pathways as linear transmitters
Source: eLife journal article supplement (doi:10.7554/elife.33617), 2018-09-17
Supplement: supp [file Figure 3 - Raw Data v2.xlsx]

## Sheet: Figure3A
Numerical data of Figure 3A
Data plotted in Figure 3A come from 7 independent experiments. Numerical data from the 11 gels are presented here.
For plotting Figure 3A, the raw beta-catenin and LRP intensity data are normalized to loading control, and then plotted relative to unstimulated samples (0 ng/mL of Wnt). The fold-activation is scaled to the average across all experiments to reduce experiment-to-experiment variability (using the 80 and 160ng/mL Wnt samples as reference)
Band intensity was quantified using Odyssey Application software version 3.0
									To correct for variation in fold-activation across experiments, we rescale all gels to the average fold-activation of all gels (as discussed in Methods)
Figure 3A - Gel 1		Lane 1	Lane 2	Lane 3	Lane 4	Lane 5	Lane 6		Average fold-activation (mean of 80 and 160ng/mL samples of all experiments)
Wnt (ng/mL)		0	10	20	40	80	160		phospho-LRP5/6	3.8888
phospho-LRP5/6 band intensity (AU)		1.95	3.58	5.34	6.93	8.54	7.93		beta-catenin	6.6655
beta-catenin band intensity (AU)		5.58	13.09	19.35	25.8	29.12	30.78
GAPDH band intensity (AU)		54.36	47.64	48.63	51.12	45.96	41.57
Data normalized to loading control:
phospho-LRP5/6		1	2.09487	3.06113	3.77909	5.17992	5.31787
beta-catenin		1	2.67678	3.87634	4.9167	6.17244	7.2133
Data normalized across gels:
phospho-LRP5/6		1	1.74439	2.40135	2.88949	3.84191	3.9357
beta-catenin		1	2.66872	3.86251	4.89788	6.14757	7.18343
Figure 3A - Gel 2		Lane 1	Lane 2	Lane 3	Lane 4	Lane 5	Lane 6
Wnt (ng/mL)		0	10	20	40	80	160
phospho-LRP5/6 band intensity (AU)		1.8	3.8	5.2	8.44	6.82	6.61
beta-catenin band intensity (AU)		4.2	11.55	14.61	23.02	23.86	28.05
GAPDH band intensity (AU)		50.54	51	52.97	60.72	57.41	48.41
Data normalized to loading control:
phospho-LRP5/6		1	2.09207	2.75636	3.90277	3.33549	3.8338
beta-catenin		1	2.7252	3.31899	4.56204	5.00114	6.97242
Data normalized across gels:
phospho-LRP5/6		1	2.22058	2.96305	4.24437	3.61033	4.16728
beta-catenin		1	2.96	3.63461	5.04685	5.54571	7.78529
Figure 3A - Gel 3		Lane 1	Lane 2	Lane 3	Lane 4	Lane 5	Lane 6
Wnt (ng/mL)		0	10	20	40	80	160
phospho-LRP5/6 band intensity (AU)		1.87	3.97	4.98	6.99	7.63	8.98
beta-catenin band intensity (AU)		5.89	15.42	22.56	29.18	31.67	39.17
GAPDH band intensity (AU)		63.56	63.86	76.75	76.17	65.98	76.5
Data normalized to loading control:
phospho-LRP5/6		1	2.11302	2.20543	3.11914	3.93056	3.98986
beta-catenin		1	2.6057	3.17197	4.13399	5.1797	5.52536
Data normalized across gels:
phospho-LRP5/6		1	2.08617	2.17635	3.06803	3.85987	3.91774
beta-catenin		1	3.09007	3.82716	5.07938	6.44053	6.89047
Figure 3A - Gel 4		Lane 1	Lane 2	Lane 3	Lane 4	Lane 5	Lane 6
Wnt (ng/mL)		0	40	80	120	160	200
phospho-LRP5/6 band intensity (AU)		3.51	9.13	11.68	12.58	13.19	13.77
beta-catenin band intensity (AU)		5.55	29.23	37.84	40.74	41.72	45.78
GAPDH band intensity (AU)		63.65	72.95	88.84	84.13	71.06	75.28
Data normalized to loading control:
phospho-LRP5/6		1	2.26953	2.38411	2.71157	3.36597	3.317
beta-catenin		1	4.59525	4.88481	5.55361	6.73325	6.97432
Data normalized across gels:
phospho-LRP5/6		1	2.95592	3.13244	3.63695	4.64517	4.56972
beta-catenin		1	5.23555	5.57668	6.36459	7.75431	8.03832
Figure 3A - Gel 5		Lane 1	Lane 2	Lane 3	Lane 4	Lane 5	Lane 6
Wnt (ng/mL)		0	40	80	120	160	200
phospho-LRP5/6 band intensity (AU)		4.34	11.7	12.75	13.57	13.84	15.33
beta-catenin band intensity (AU)		6.54	38.75	43.75	47.58	50.87	52.32
GAPDH band intensity (AU)		70.22	73.29	77.24	68.08	73.63	72.9
Data normalized to loading control:
phospho-LRP5/6		1	2.58293	2.67079	3.22501	3.04125	3.4024
beta-catenin		1	5.67688	6.08161	7.50392	7.41805	7.7059
Data normalized across gels:
phospho-LRP5/6		1	3.46375	3.6005	4.46313	4.17711	4.73923
beta-catenin		1	5.60829	6.00708	7.40852	7.32392	7.60754
Figure 3A - Gel 6		Lane 1	Lane 2	Lane 3	Lane 4	Lane 5	Lane 6
Wnt (ng/mL)		0	20	80	120	160	200
phospho-LRP5/6 band intensity (AU)		2.49	9.26	9.8	10.69	15.3	13.26
beta-catenin band intensity (AU)		7	26.62	38.81	41.98	46.05	45.53
GAPDH band intensity (AU)		121.46	108.99	116.94	119.4	121.43	120.2
Histone H3 band intensity (AU)		39.22	37.29	37.12	40.58	37.56	40.09
Weighted Average Loading Control (AU)		2.04363	1.88808	1.95101	2.06138	2.00042	2.05548
Data normalized to loading control:
phospho-LRP5/6		1	4.02528	4.1226	4.25621	6.27731	5.29462
beta-catenin		1	4.11618	5.8075	5.94551	6.72067	6.46681
Data normalized across gels:
phospho-LRP5/6		1	3.08084	3.14778	3.23968	4.62983	3.95392
beta-catenin		1	4.3538	6.1741	6.32263	7.1569	6.88368
Figure 3A - Gel 7		Lane 1	Lane 2	Lane 3	Lane 4	Lane 5	Lane 6
Wnt (ng/mL)		0	20	80	120	160	200
phospho-LRP5/6 band intensity (AU)		1.83	6.33	14.41	14.12	13.68	17.04
beta-catenin band intensity (AU)		5.53	23.84	38.21	47.21	44.23	49.2
GAPDH band intensity (AU)		120.75	125.67	131.67	138.06	135.89	133.09
Histone H3 band intensity (AU)		32.56	31.97	30.51	37.36	35.35	37.18
Weighted Average Loading Control (AU)		1.87608	1.8964	1.89951	2.1489	2.07347	2.10565
Data normalized to loading control:
phospho-LRP5/6		1	3.42194	7.77719	6.73626	6.76378	8.29629
beta-catenin		1	4.26483	6.82435	7.45322	7.23679	7.92694
Data normalized across gels:
phospho-LRP5/6		1	2.11579	4.12224	3.64269	3.65537	4.36139
beta-catenin		1	4.06718	6.47176	7.06256	6.85923	7.5076
Figure 3A - Gel 8		Lane 1	Lane 2	Lane 3	Lane 4	Lane 5	Lane 6
Wnt (ng/mL)		0	10	20	40	80	160
phospho-LRP5/6 band intensity (AU)		2.84	5.16	7.75	8.34	9.11	7.83
beta-catenin band intensity (AU)		3.03	9.98	15.27	19.44	22.83	21.85
GAPDH band intensity (AU)		80.41	79.43	88.59	90.76	87.92	79.24
Histone H3 band intensity (AU)		31.55	29.92	32.66	31.2	34.79	28.04
Weighted Average Loading Control (AU)		1.95888	1.89529	2.0912	2.07036	2.15118	1.83309
Data normalized to loading control:
phospho-LRP5/6		1	1.87786	2.5562	2.77849	2.92099	2.94624
beta-catenin		1	3.40424	4.72071	6.07037	6.86109	7.70607
Data normalized across gels:
phospho-LRP5/6		1	2.31152	3.32495	3.65706	3.86994	3.90766
beta-catenin		1	3.16775	4.35473	5.57163	6.28457	7.04643
Figure 3A - Gel 9		Lane 1	Lane 2	Lane 3	Lane 4	Lane 5	Lane 6
Wnt (ng/mL)		0	80	160	320	640	1280
phospho-LRP5/6 band intensity (AU)		2.86	9.54	9.09	8.44	9.22	9.76
beta-catenin band intensity (AU)		3.17	22.92	25.63	30.1	35.39	38.05
GAPDH band intensity (AU)		82.9	84.21	81.67	76.77	79.11	86.57
Histone H3 band intensity (AU)		30.6	31.34	34.52	34.57	34.67	32.21
Weighted Average Loading Control (AU)		1.94025	1.97869	2.04407	1.98574	2.01735	2.03389
Data normalized to loading control:
phospho-LRP5/6		1	3.27087	3.01689	2.88345	3.10057	3.25548
beta-catenin		1	7.08984	7.67453	9.27777	10.7374	11.4506
Data normalized across gels:
phospho-LRP5/6		1	4.05992	3.71769	3.53789	3.83045	4.03918
beta-catenin		1	6.40598	6.92501	8.34822	9.64392	10.277
Figure 3A - Gel 10		Lane 1	Lane 2	Lane 3	Lane 4	Lane 5	Lane 6
Wnt (ng/mL)		0	80	160	320	640	1280
phospho-LRP5/6 band intensity (AU)		2.88	7.38	10.24	9.9	11.15	10.77
beta-catenin band intensity (AU)		2.96	16.86	25.53	25.75	33.14	36.32
GAPDH band intensity (AU)		116.77	108.6	125.03	101.54	118.48	132.47
Histone H3 band intensity (AU)		48.29	50.64	51.07	52.32	51.32	54.22
Weighted Average Loading Control (AU)		1.93791	1.91397	2.0626	1.88645	2.01156	2.1875
Data normalized to loading control:
phospho-LRP5/6		1	2.59455	3.34061	3.53128	3.72978	3.3129
beta-catenin		1	5.76719	8.1036	8.93665	10.786	10.8703
Data normalized across gels:
phospho-LRP5/6		1	3.34112	4.43649	4.71642	5.00786	4.3958
beta-catenin		1	5.55042	7.78058	8.57575	10.341	10.4214
Figure 3A - Gel 11		Lane 1	Lane 2	Lane 3	Lane 4	Lane 5	Lane 6
Wnt (ng/mL)		0	80	160	320	640	1280
phospho-LRP5/6 band intensity (AU)		3.46	9.02	10.72	10.99	12.06	10.36
beta-catenin band intensity (AU)		2.94	21.6	26.4	30.67	35.04	36.12
GAPDH band intensity (AU)		113.79	126.31	123.14	129.57	126.24	125.21
Histone H3 band intensity (AU)		61.96	64	59.88	60.22	57.2	56.91
Weighted Average Loading Control (AU)		1.94952	2.08444	1.99025	2.04775	1.97059	1.95746
Data normalized to loading control:
phospho-LRP5/6		1	2.4382	3.03487	3.02394	3.44828	2.98208
beta-catenin		1	6.8714	8.79584	9.93157	11.7909	12.2359
Data normalized across gels:
phospho-LRP5/6		1	3.39251	4.38509	4.36692	5.07282	4.29728
beta-catenin		1	5.86776	7.46324	8.40482	9.94634	10.3153

## Sheet: Figure 3B
Numerical data of Figure 3B
Data plotted in Figure 3B come from 5 independent experiments. Numerical data from the five gels are presented here.
For plotting Figure 3B, the raw dpERK1/2 intensity data are normalized to Histone H3 (loading control), and then plotted relative to control cells (0 ng/mL of EGF)
Band intensity was quantified using Odyssey Application software version 3.0
Figure 3B - Gel 1		Lane 1	Lane 2	Lane 3	Lane 4	Lane 5	Lane 6
EGF (ng/mL)		0	0	0.1	0.2	0.5	1
dpERK1/2 band intensity (AU)		0.74	0.98	1.07	1.74	3.14	4.07
Histone H3 band intensity (AU)		20.57	22.79	22.28	23.85	25.96	21.14
Normalized data:
dpERK1/2		0.911029	1.08897	1.2162	1.84755	3.06309	4.87556
Figure 3B - Gel 2		Lane 1	Lane 2	Lane 3	Lane 4	Lane 5	Lane 6
EGF (ng/mL)		0	0	0.1	0.5	0.2	1
dpERK1/2 band intensity (AU)		0.66	0.63	0.92	2.21	1.33	3.13
Histone H3 band intensity (AU)		15.77	17.27	17.36	19.09	19.23	16.78
Normalized data:
dpERK1/2		1.06858	0.931417	1.35311	2.95585	1.76591	4.76265
Figure 3B - Gel 3		Lane 1	Lane 2	Lane 3	Lane 4	Lane 5	Lane 6
EGF (ng/mL)		2	50	4	1	0.1	0.5
dpERK1/2 band intensity (AU)		2.12	3.65	3.52	1.31	0.46	1.42
Histone H3 band intensity (AU)		11.84	9.49	8.4	12.34	16.56	33.85
Normalized data:
dpERK1/2		8.28081	17.7875	19.3799	4.90959	1.28465	1.94007
Figure 3B - Gel 4		Lane 1	Lane 2	Lane 3	Lane 4	Lane 5	Lane 6
EGF (ng/mL)		1	50	2	0.1	8	4
dpERK1/2 band intensity (AU)		1.26	2.83	1.45	0.3	2.66	2.43
Histone H3 band intensity (AU)		15.97	12.69	9.08	10.54	9.42	8.25
Normalized data:
dpERK1/2		3.56099	10.0654	7.20755	1.28465	12.7449	13.2941
Figure 3B - Gel 5		Lane 1	Lane 2	Lane 3	Lane 4	Lane 5	Lane 6
EGF (ng/mL)		4	0	1	0	3	2
dpERK1/2 band intensity (AU)		3.99	0.33	2.37	0.36	3.45	2.52
Histone H3 band intensity (AU)		10.85	11.61	13.2	11.56	11.6	12.42
Normalized data:
dpERK1/2		12.3475	0.954368	6.02849	1.04563	9.98609	6.8126

## Sheet: Figure 3C
Numerical data of Figure 3C
Data plotted in Figure 3C come from 5 independent experiments. Numerical data from the 9 gels are presented here.
For plotting Figure 3C, the raw beta-catenin and LRP intensity data are normalized to loading control, and then plotted relative to unstimulated samples (0 ng/mL of Wnt). The fold-activation is scaled to the average across all experiments to reduce experiment-to-experiment variability (using the 80 and 160ng/mL Wnt samples as reference)
Band intensity was quantified using Odyssey Application software version 3.0
											To correct for variation in fold-activation across experiments, we rescale all gels to the average fold-activation of all gels (as discussed in Methods)
Figure 3C - Gel 1		Lane 1	Lane 2	Lane 3	Lane 4	Lane 5	Lane 6	Lane 7	Lane 8		Average fold-activation (mean of 80 and 160ng/mL samples of all experiments)
Wnt (ng/mL)		0	0	10	20	40	80	160	320		phospho-LRP5/6	2.85986
CHIR99021 (mM)		1	1	1	1	1	1	1	1		beta-catenin	3.00822
phospho-LRP5/6 band intensity (AU)		1.47	1.1	1.89	2.72	3.69	4.05	4.24	5.02
beta-catenin band intensity (AU)		24.19	28.35	39.42	44.96	51.38	59.16	75.76	78.23
GAPDH band intensity (AU)		100.91	109.76	115.44	119.34	123.08	124.88	132.39	129.65
Data normalized to loading control:
phospho-LRP5/6		1.18486	0.81514	1.33165	1.85382	2.4385	2.63782	2.60492	3.14931
beta-catenin		0.962707	1.03729	1.37136	1.51298	1.67648	1.90251	2.29814	2.42322
Data normalized across gels:
phospho-LRP5/6		1.21205	0.787949	1.38043	1.97941	2.65009	2.87873	2.84099	3.46545
beta-catenin		0.931936	1.06806	1.67778	1.93624	2.23466	2.64719	3.36926	3.59754
Figure 3C - Gel 2		Lane 1	Lane 2	Lane 3	Lane 4	Lane 5	Lane 6	Lane 7	Lane 8
Wnt (ng/mL)		0	0	10	20	40	80	160	320
CHIR99021 (mM)		1	1	1	1	1	1	1	1
phospho-LRP5/6 band intensity (AU)		0.97	0.93	2.17	3.54	4.67	4.25	4.82	4.56
beta-catenin band intensity (AU)		23.95	24.87	38.66	44.71	51.01	55.49	72.97	74.87
GAPDH band intensity (AU)		129.03	123.46	124.53	132.35	134.58	131.75	135.04	125.1
Data normalized to loading control:
phospho-LRP5/6		0.998992	1.00101	2.31562	3.55435	4.61124	4.28666	4.74314	4.84383
beta-catenin		0.959112	1.04089	1.60414	1.74556	1.95853	2.1763	2.79214	3.09247
Data normalized across gels:
phospho-LRP5/6		0.999467	1.00053	1.69614	2.3516	2.91084	2.73909	2.98063	3.03391
beta-catenin		0.944676	1.05532	1.81743	2.00878	2.29694	2.5916	3.42485	3.83122
Figure 3C - Gel 3		Lane 1	Lane 2	Lane 3	Lane 4	Lane 5	Lane 6	Lane 7	Lane 8
Wnt (ng/mL)		0	0	10	20	40	80	160	320
CHIR99021 (mM)		0	1	1	1	1	1	1	1
phospho-LRP5/6 band intensity (AU)		3.13	2.65	4.72	5.22	7.67	7.22	7.66	8.34
beta-catenin band intensity (AU)		6.04	25.17	39.94	49.38	62.99	72.22	80.35	84.48
GAPDH band intensity (AU)		117.58	125.24	118.52	120.79	129.34	128.59	132.83	139.68
Histone H3 band intensity (AU)		34.72	30.49	30.77	33.27	32.39	29.54	28.37	31.28
Weighted Average Loading Control (AU)		2.04424	1.96714	1.92365	2.02238	2.06075	1.96257	1.95784	2.10567
Data normalized to loading control:
phospho-LRP5/6		1.13658	1	1.8214	1.91601	2.76286	2.73087	2.9043	2.94012
beta-catenin		0.230917	1	1.62268	1.90827	2.3889	2.87597	3.20746	3.13557
Data normalized across gels:
phospho-LRP5/6		1.13976	1	1.8405	1.93731	2.80386	2.77113	2.94859	2.98525
beta-catenin		0.243534	1	1.61247	1.89337	2.36612	2.8452	3.17125	3.10053
Figure 3C - Gel 4		Lane 1	Lane 2	Lane 3	Lane 4	Lane 5	Lane 6
Wnt (ng/mL)		0	10	20	40	80	160
CHIR99021 (mM)		1	1	1	1	1	1
phospho-LRP5/6 band intensity (AU)		2.37	3.64	5.23	5.94	6.3	6.26
beta-catenin band intensity (AU)		14.97	26.02	31.24	38.45	43.85	52.59
GAPDH band intensity (AU)		107.39	104.99	100.63	96.66	103.29	109.48
Histone H3 band intensity (AU)		25.6	26.17	26.29	26.94	25.05	23.94
Weighted Average Loading Control (AU)		2.03265	2.03173	1.99437	1.98143	1.9717	1.98812
Data normalized to loading control:
phospho-LRP5/6		1	1.53656	2.24911	2.57112	2.7404	2.70052
beta-catenin		1	1.73893	2.12689	2.63487	3.01974	3.59172
Data normalized across gels:
phospho-LRP5/6		1	1.58004	2.35032	2.69842	2.88142	2.8383
beta-catenin		1	1.64359	1.98149	2.42392	2.75914	3.25731
Figure 3C - Gel 5		Lane 1	Lane 2	Lane 3	Lane 4	Lane 5	Lane 6
Wnt (ng/mL)		0	10	20	40	80	160
CHIR99021 (mM)		1	1	1	1	1	1
phospho-LRP5/6 band intensity (AU)		3.75	4.74	7.16	6.64	7.51	6.93
beta-catenin band intensity (AU)		16.5	26.75	36.58	43.38	49.6	50.72
GAPDH band intensity (AU)		113.24	114.84	120.41	113.57	117.28	112.66
Histone H3 band intensity (AU)		32.12	29.87	30.97	30.6	25.88	25.6
Weighted Average Loading Control (AU)		2.08286	2.0196	2.1056	2.03361	1.90399	1.85433
Data normalized to loading control:
phospho-LRP5/6		1	1.30359	1.88871	1.81354	2.1908	2.07574
beta-catenin		1	1.67199	2.19302	2.69275	3.28846	3.45276
Data normalized across gels:
phospho-LRP5/6		1	1.49823	2.4585	2.33514	2.95428	2.76545
beta-catenin		1	1.56926	2.01065	2.43399	2.93863	3.07782
Figure 3C - Gel 6		Lane 1	Lane 2	Lane 3	Lane 4	Lane 5	Lane 6
Wnt (ng/mL)		0	80	160	320	640	1280
CHIR99021 (mM)		1	1	1	1	1	1
phospho-LRP5/6 band intensity (AU)		2.41	6.81	6.61	7.06	7.35	6.87
beta-catenin band intensity (AU)		14.68	46.65	50.89	57.88	62.98	70.65
GAPDH band intensity (AU)		108.05	116.21	105.71	107.68	107.36	121.41
Histone H3 band intensity (AU)		33.67	37.12	34.94	37.67	36.09	38.99
Weighted Average Loading Control (AU)		1.89747	2.06568	1.91128	2.00399	1.95772	2.16386
Data normalized to loading control:
phospho-LRP5/6		1	2.59562	2.72292	2.77375	2.95594	2.49969
beta-catenin		1	2.91902	3.44157	3.73321	4.15816	4.2202
Data normalized across gels:
phospho-LRP5/6		1	2.78852	2.93121	2.98818	3.19239	2.68099
beta-catenin		1	2.76757	3.24888	3.5175	3.90892	3.96606
Figure 3C - Gel 7		Lane 1	Lane 2	Lane 3	Lane 4	Lane 5	Lane 6
Wnt (ng/mL)		0	80	160	320	640	1280
CHIR99021 (mM)		1	1	1	1	1	1
phospho-LRP5/6 band intensity (AU)		2.92	6.91	7.87	7.76	7.94	8.1
beta-catenin band intensity (AU)		15.65	46.52	55.23	62.79	67.85	71.82
GAPDH band intensity (AU)		111.7	108.86	107.78	113.75	106.05	116.23
Histone H3 band intensity (AU)		32.71	35.39	32.7	33.48	30.07	34.09
Weighted Average Loading Control (AU)		1.99779	2.05317	1.96209	2.03958	1.86694	2.08043
Data normalized to loading control:
phospho-LRP5/6		1	2.3026	2.74425	2.60308	2.90976	2.66379
beta-catenin		1	2.89234	3.59329	3.92992	4.63932	4.40685
Data normalized across gels:
phospho-LRP5/6		1	2.59027	3.12945	2.9571	3.33151	3.03122
beta-catenin		1	2.69441	3.32204	3.62346	4.25866	4.05051
Figure 3C - Gel 8		Lane 1	Lane 2	Lane 3	Lane 4	Lane 5	Lane 6
Wnt (ng/mL)		0	160	320	80	640	1280
CHIR99021 (mM)		1	1	1	1	1	1
phospho-LRP5/6 band intensity (AU)		2.34	6.59	8.3	8.3	7.68	6.94
beta-catenin band intensity (AU)		11.61	39.51	46.32	35.79	53.16	53.46
GAPDH band intensity (AU)		132.27	132.77	126.87	132.05	134.41	136.57
Histone H3 band intensity (AU)		42.28	42.2	50.59	51.01	50.54	49.91
Weighted Average Loading Control (AU)		1.88369	1.88579	2.01695	2.06484	2.07281	2.07592
Data normalized to loading control:
phospho-LRP5/6		1	2.81311	3.31267	3.23583	2.9826	2.69118
beta-catenin		1	3.39931	3.72608	2.81224	4.16105	4.17826
Data normalized across gels:
phospho-LRP5/6		1	2.66568	3.12463	3.05404	2.8214	2.55367
beta-catenin		1	3.28816	3.59978	2.72829	4.01461	4.03102
Figure 3C - Gel 9		Lane 1	Lane 2	Lane 3	Lane 4	Lane 5	Lane 6
Wnt (ng/mL)		0	80	1280	640	160	320
CHIR99021 (mM)		1	1	1	1	1	1
phospho-LRP5/6 band intensity (AU)		3.41	8.78	10.21	9.73	10.74	9.29
beta-catenin band intensity (AU)		13.51	42.44	67.58	59.34	49.53	52.6
GAPDH band intensity (AU)		127.95	140.3	141.21	139.72	147.68	145.17
Histone H3 band intensity (AU)		51.05	47.21	50.13	48.54	52.76	50.76
Weighted Average Loading Control (AU)		1.9312	1.94251	2.00731	1.96494	2.10593	2.04811
Data normalized to loading control:
phospho-LRP5/6		1	2.55978	2.8806	2.80437	2.88823	2.56883
beta-catenin		1	3.12308	4.81255	4.31687	3.36198	3.67116
Data normalized across gels:
phospho-LRP5/6		1	2.6827	3.0288	2.94656	3.03703	2.69246
beta-catenin		1	2.90125	4.41421	3.97032	3.11519	3.39208

## Sheet: Figure 3D
Numerical data of Figure 3D
Data plotted in Figure 3D come from 3 independent experiments. Numerical data from the three gels are presented here.
For plotting Figure 3D, the raw dpERK1/2 intensity data are normalized to Histone H3 (loading control), and then plotted relative to wt control cells (0 ng/mL of EGF)
Band intensity was quantified using Odyssey Application software version 3.0
Figure 3D - Gel 1		Lane 1	Lane 2	Lane 3	Lane 4	Lane 5	Lane 6	Lane 7
Raf S289/296/301A		wt		Raf S289/296/301A
EGF (ng/mL)		0	4	0	1	2	3	4
dpERK1/2 band intensity (AU)		0.33	4.4	0.56	3.02	4.08	4.31	4.81
Histone H3 band intensity (AU)		13.22	12.34	16.18	13.79	13.66	18.46	17.71
Normalized data:
dpERK1/2		0.721229	10.3022	1	6.32751	8.62978	6.74584	7.84724
Figure 3D - Gel 2		Lane 1	Lane 2	Lane 3	Lane 4	Lane 5	Lane 6	Lane 7
Raf S289/296/301A		wt		Raf S289/296/301A
EGF (ng/mL)		0	4	0	0.2	0.5	1	4
dpERK1/2 band intensity (AU)		16000	126000	15800	29200	40300	74200	120000
Histone H3 band intensity (AU)		643000	688000	424000	422000	419000	465000	471000
Normalized data:
dpERK1/2		0.667756	4.91463	1	1.85686	2.58107	4.28213	6.83706
Figure 3D - Gel 3		Lane 1	Lane 2	Lane 3	Lane 4	Lane 5	Lane 6
Raf S289/296/301A		wt	Raf S289/296/301A
EGF (ng/mL)		0	0	1	2	3	4
dpERK1/2 band intensity (AU)		0.54	0.46	2.94	3.81	4.11	4.86
Histone H3 band intensity (AU)		11.14	8.42	8.88	9.19	9.74	10.84
Normalized data:
dpERK1/2		0.887284	1	6.06022	7.58864	7.72391	8.20656
