# Supplementary figures and images for: Signaling pathways as linear transmitters
Source: eLife journal article supplement (doi:10.7554/elife.33617), 2018-09-17

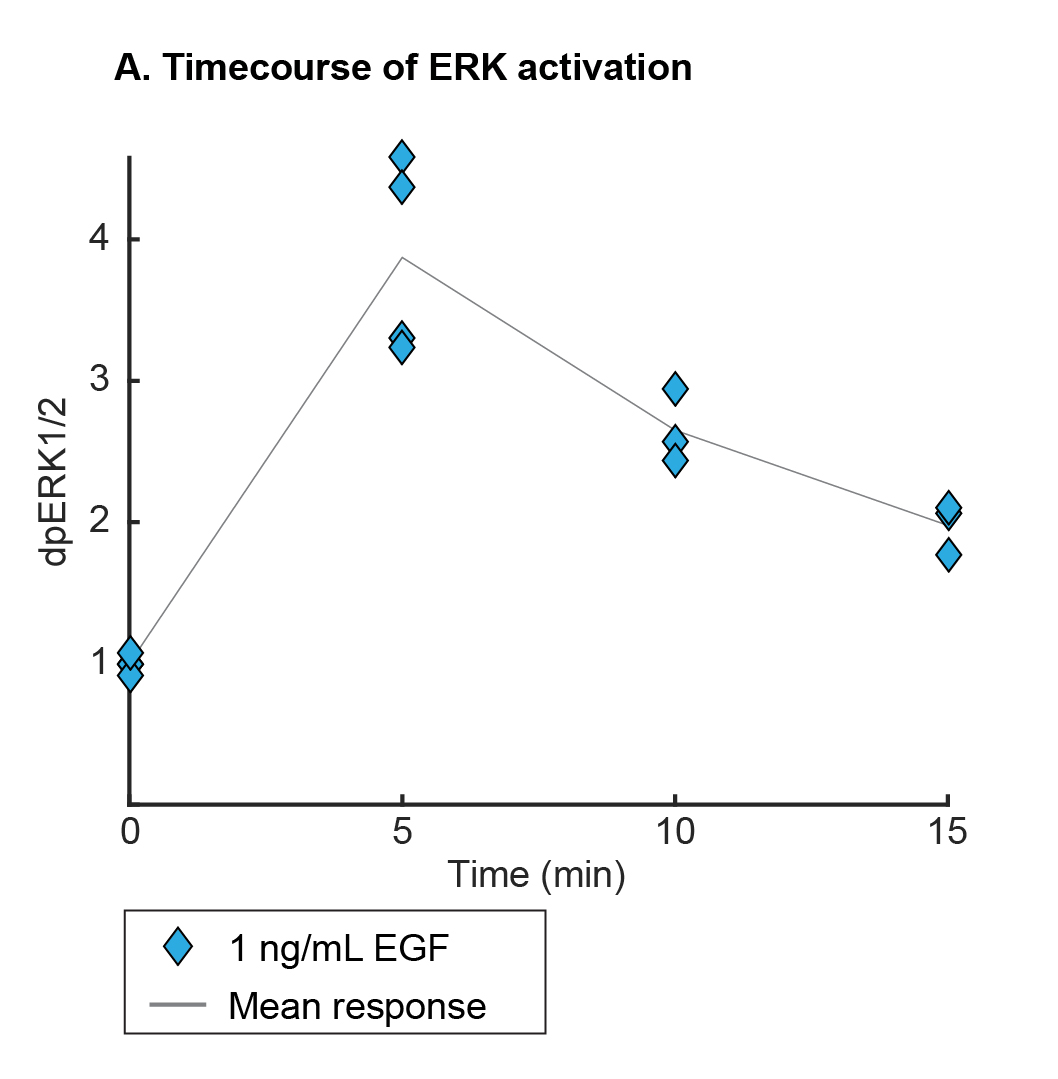

Supplement: supp [file elife-33617-supp-v2.zip › elife_poa_e33617_Figure_3_figure_supplement_3.jpg]

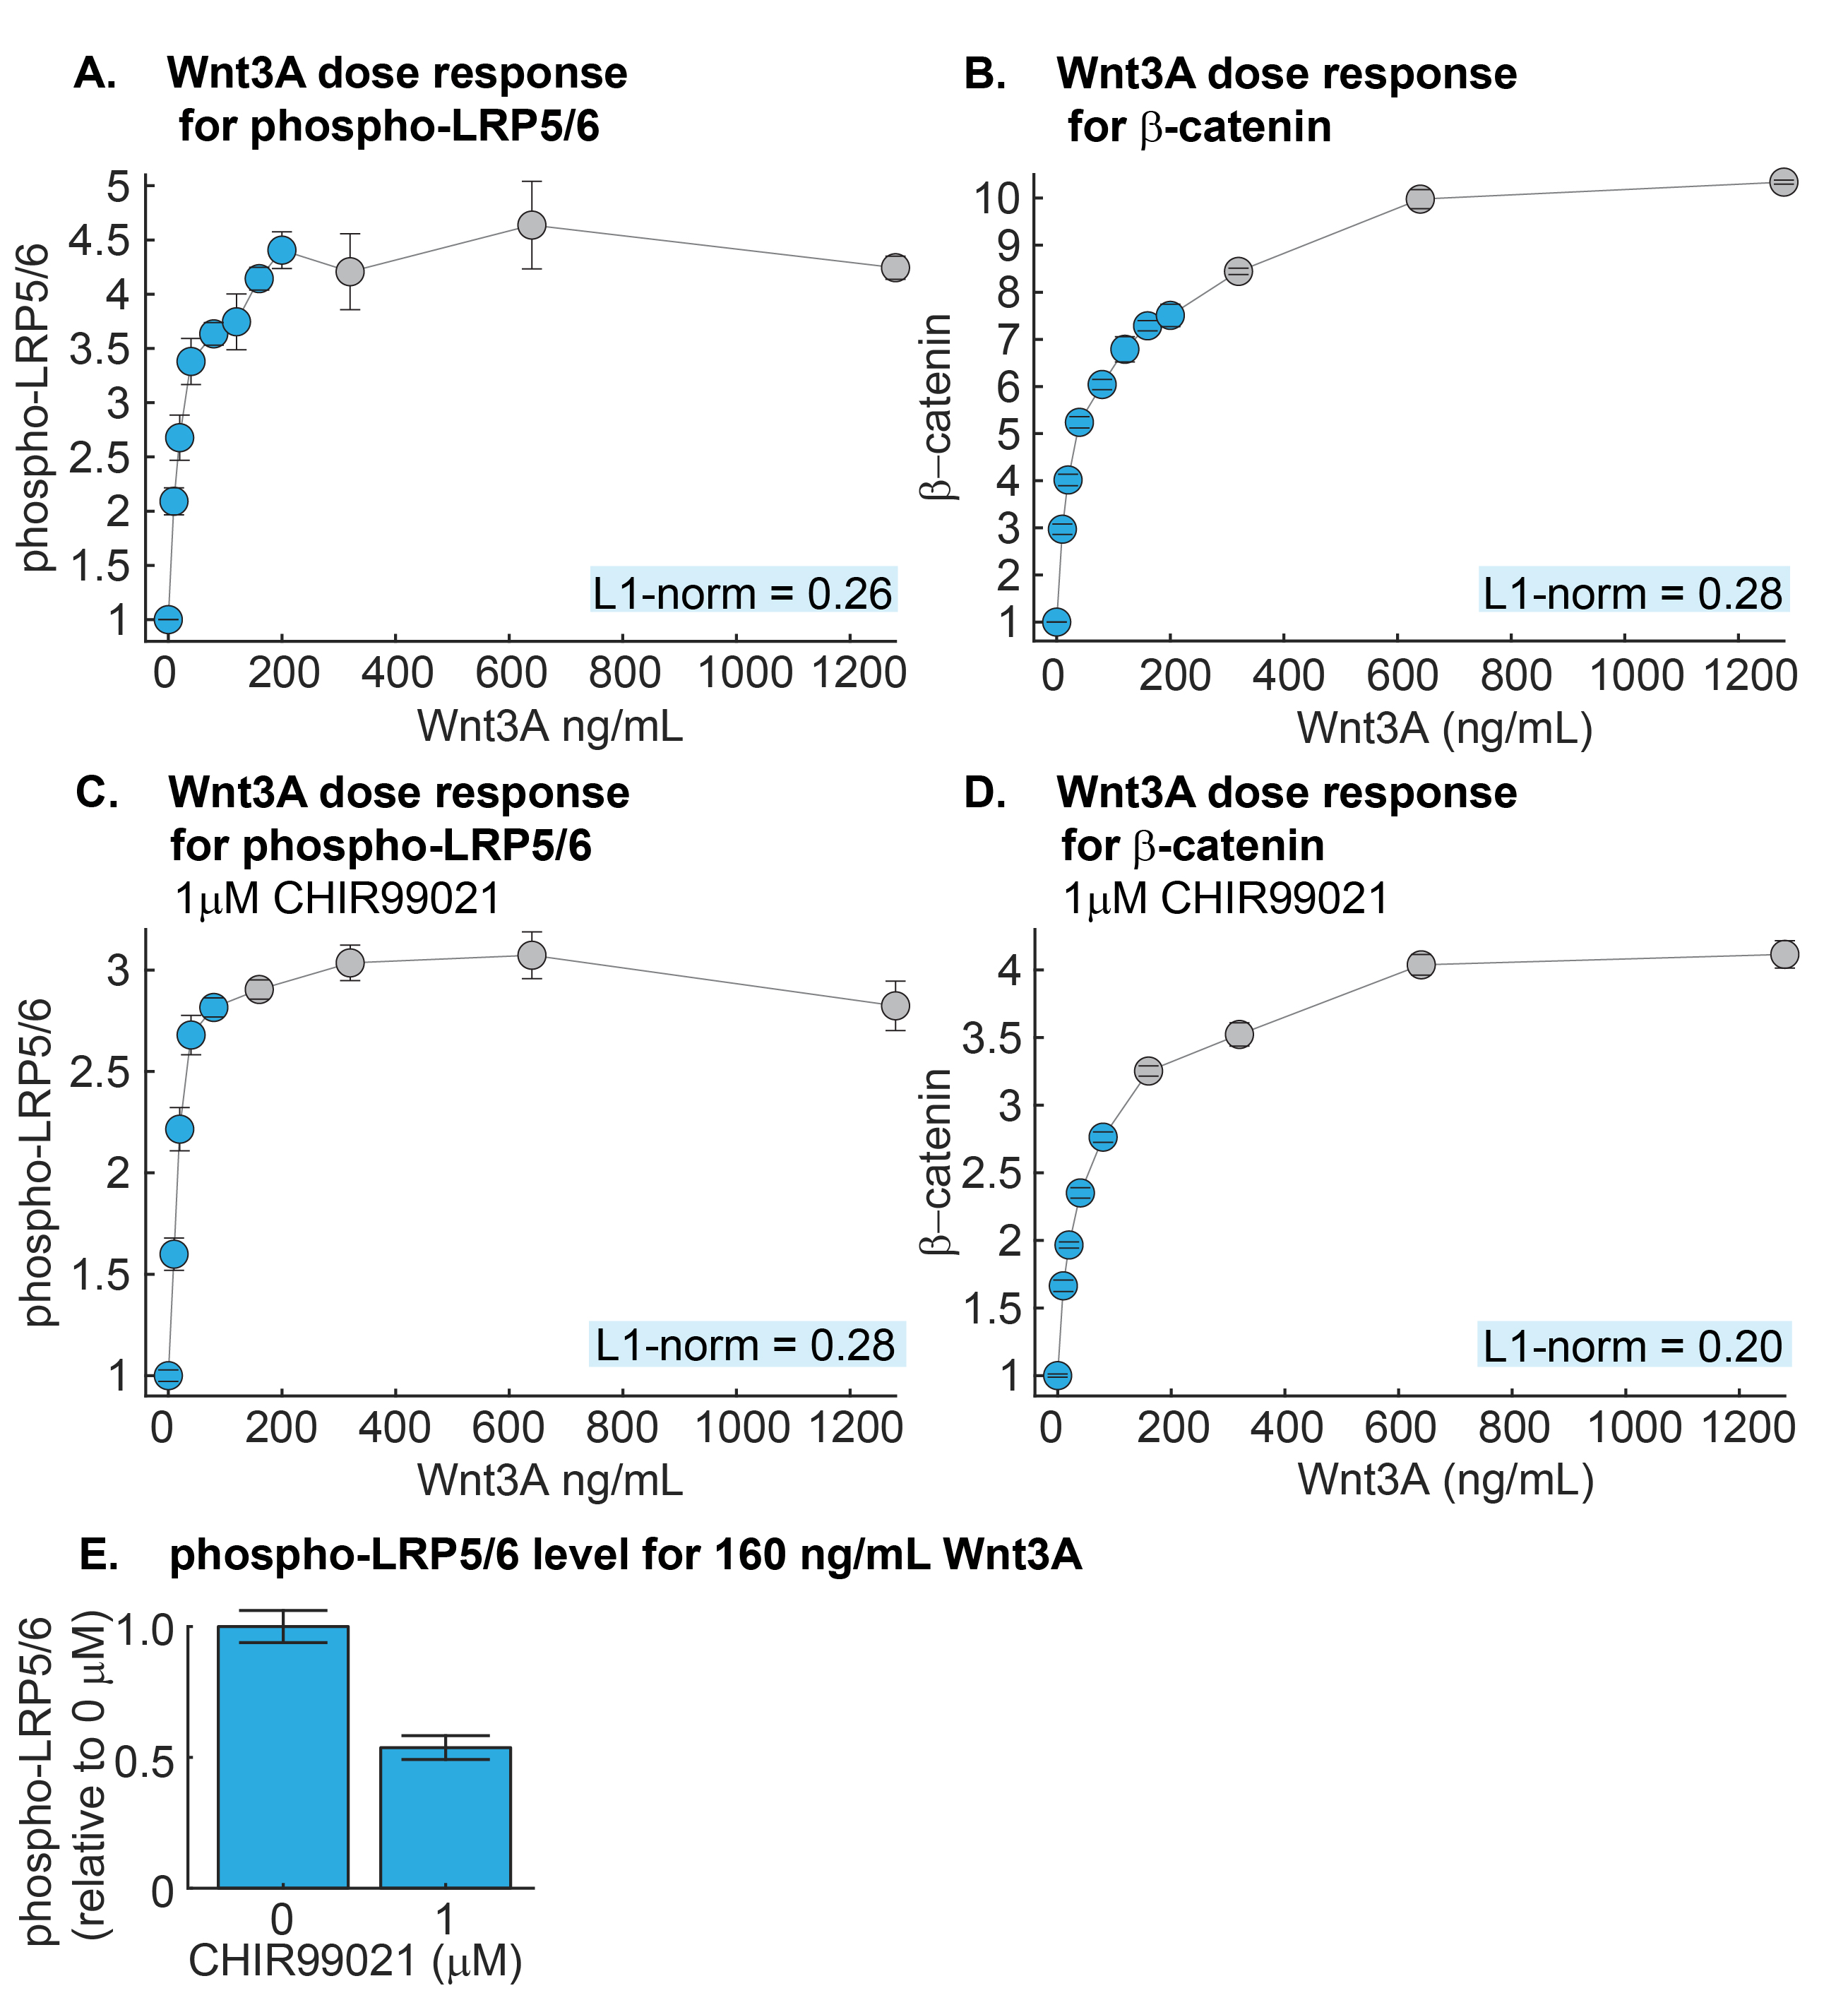

Supplement: supp [file elife-33617-supp-v2.zip › elife_poa_e33617_Figure_3_figure_supplement_2.jpg]

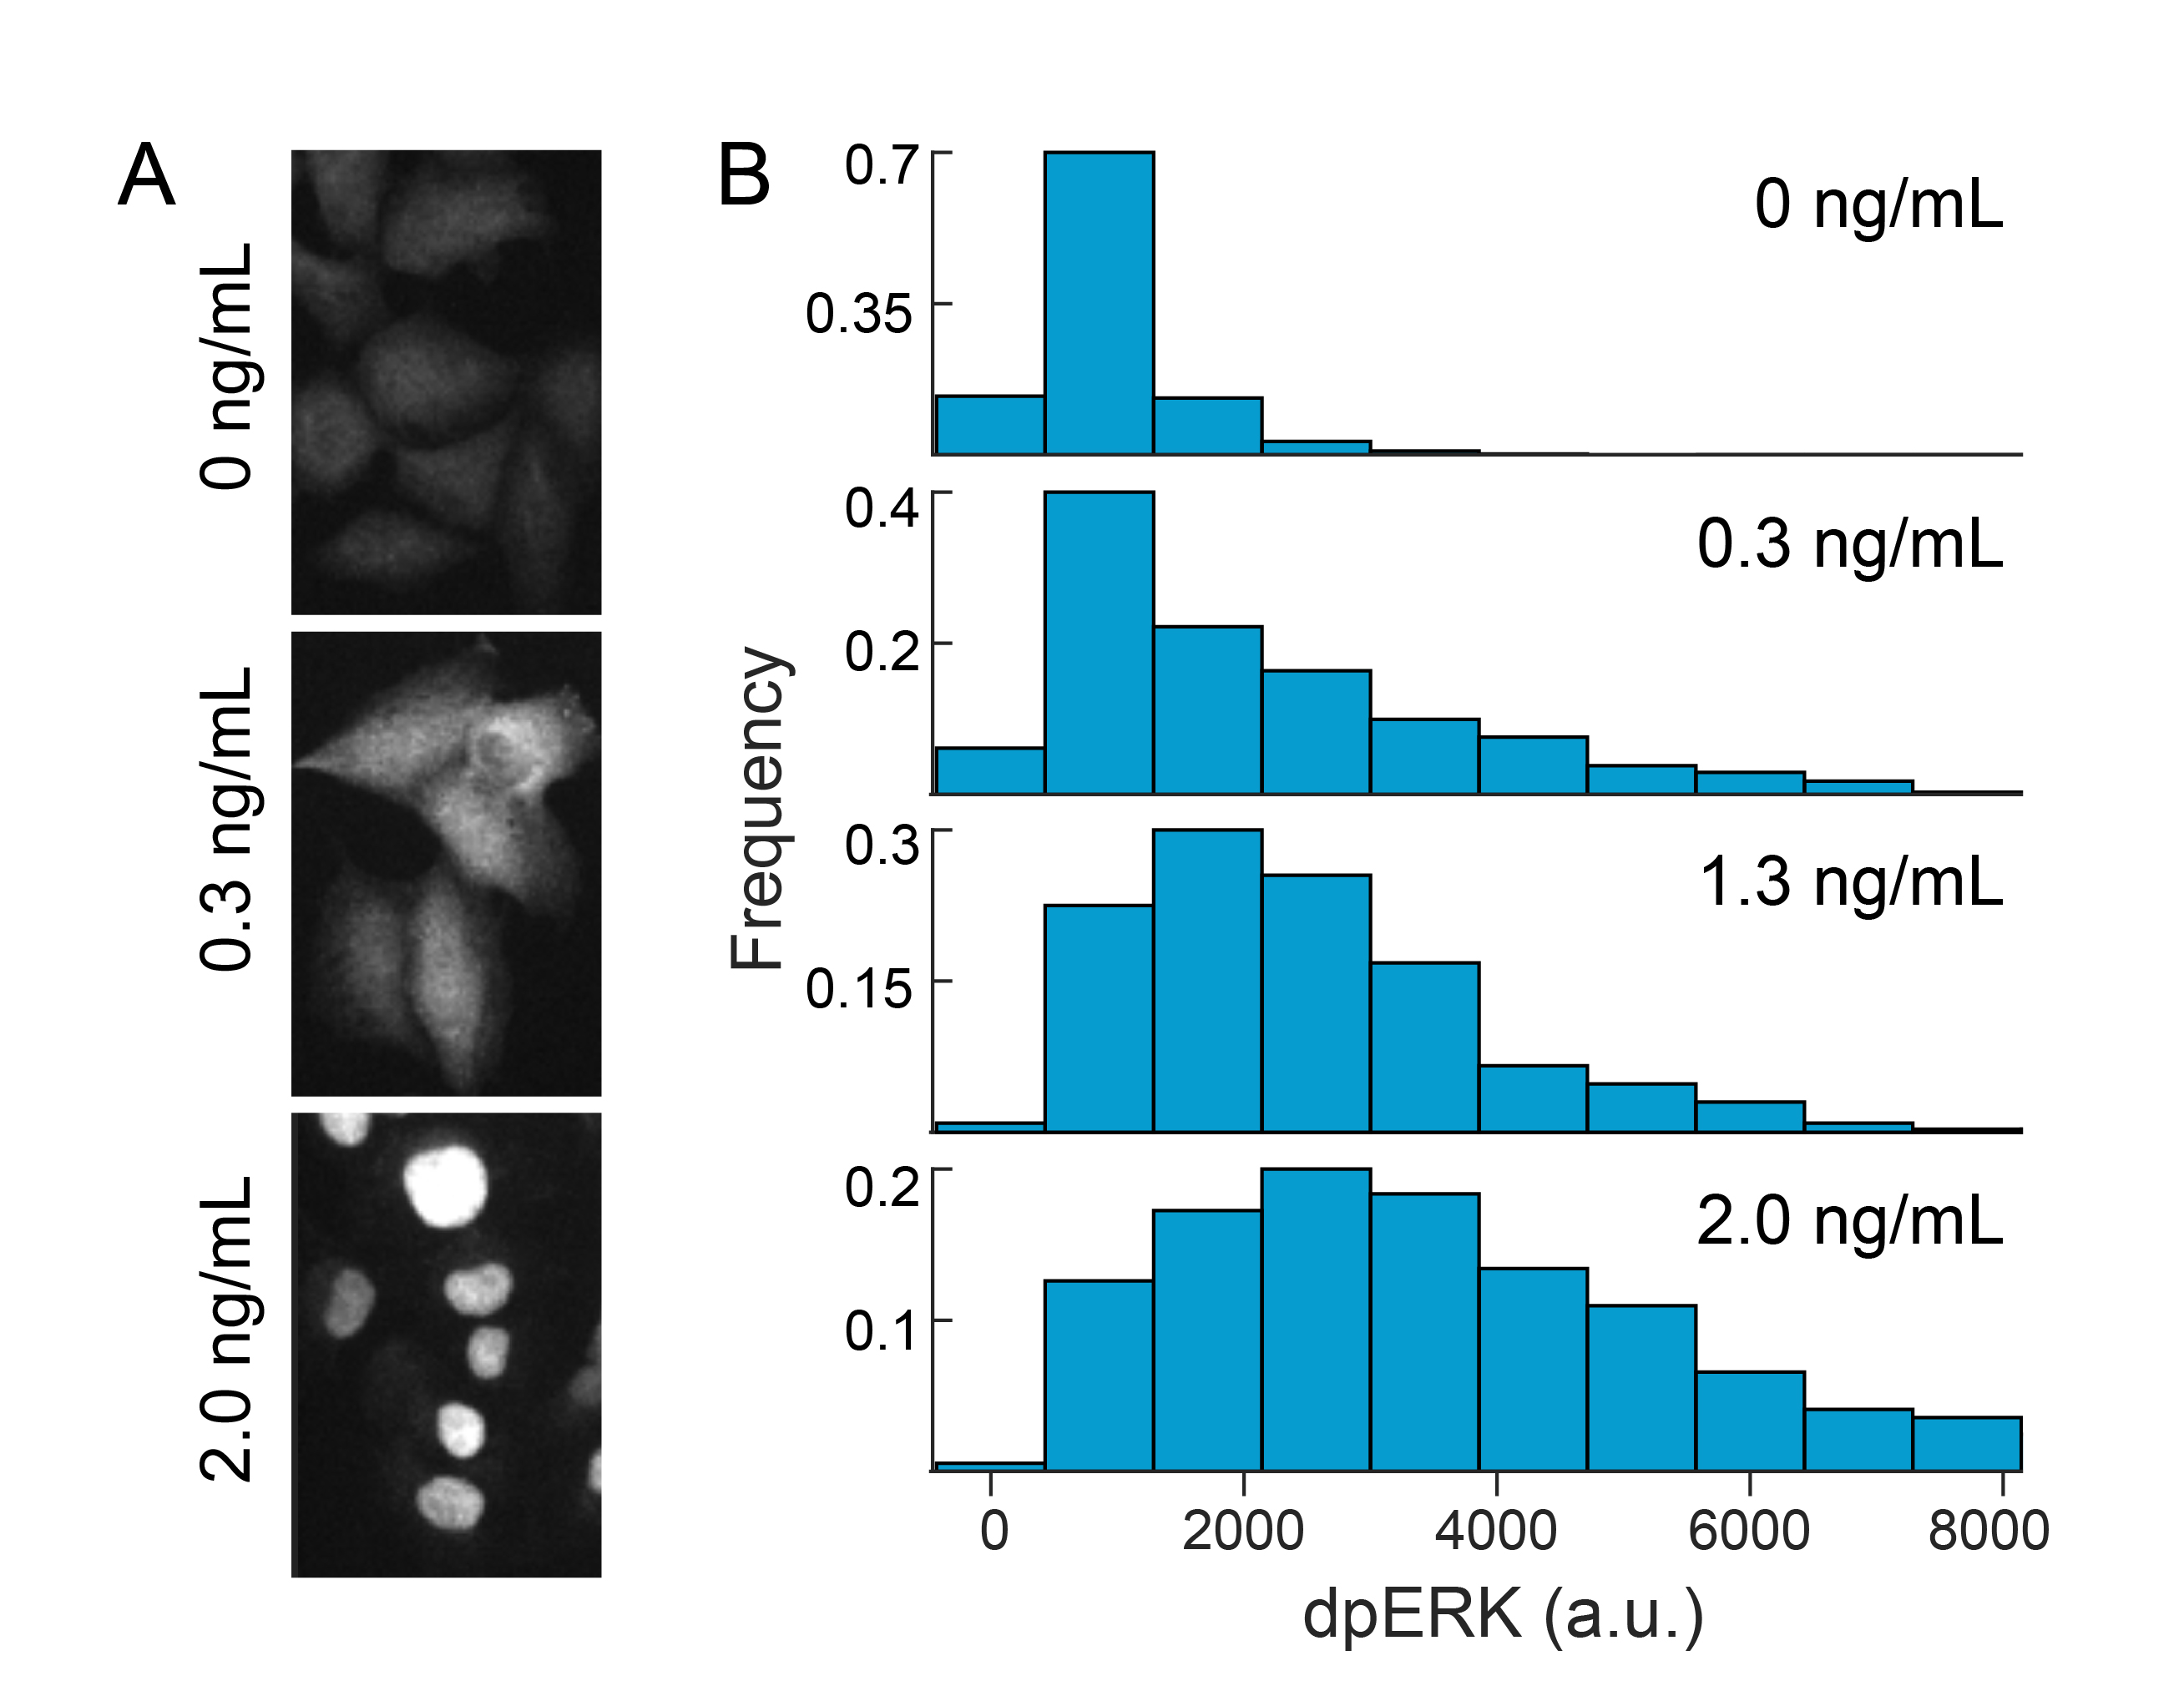

Supplement: supp [file elife-33617-supp-v2.zip › elife_poa_e33617_Figure_3_figure_supplement_4.jpg]

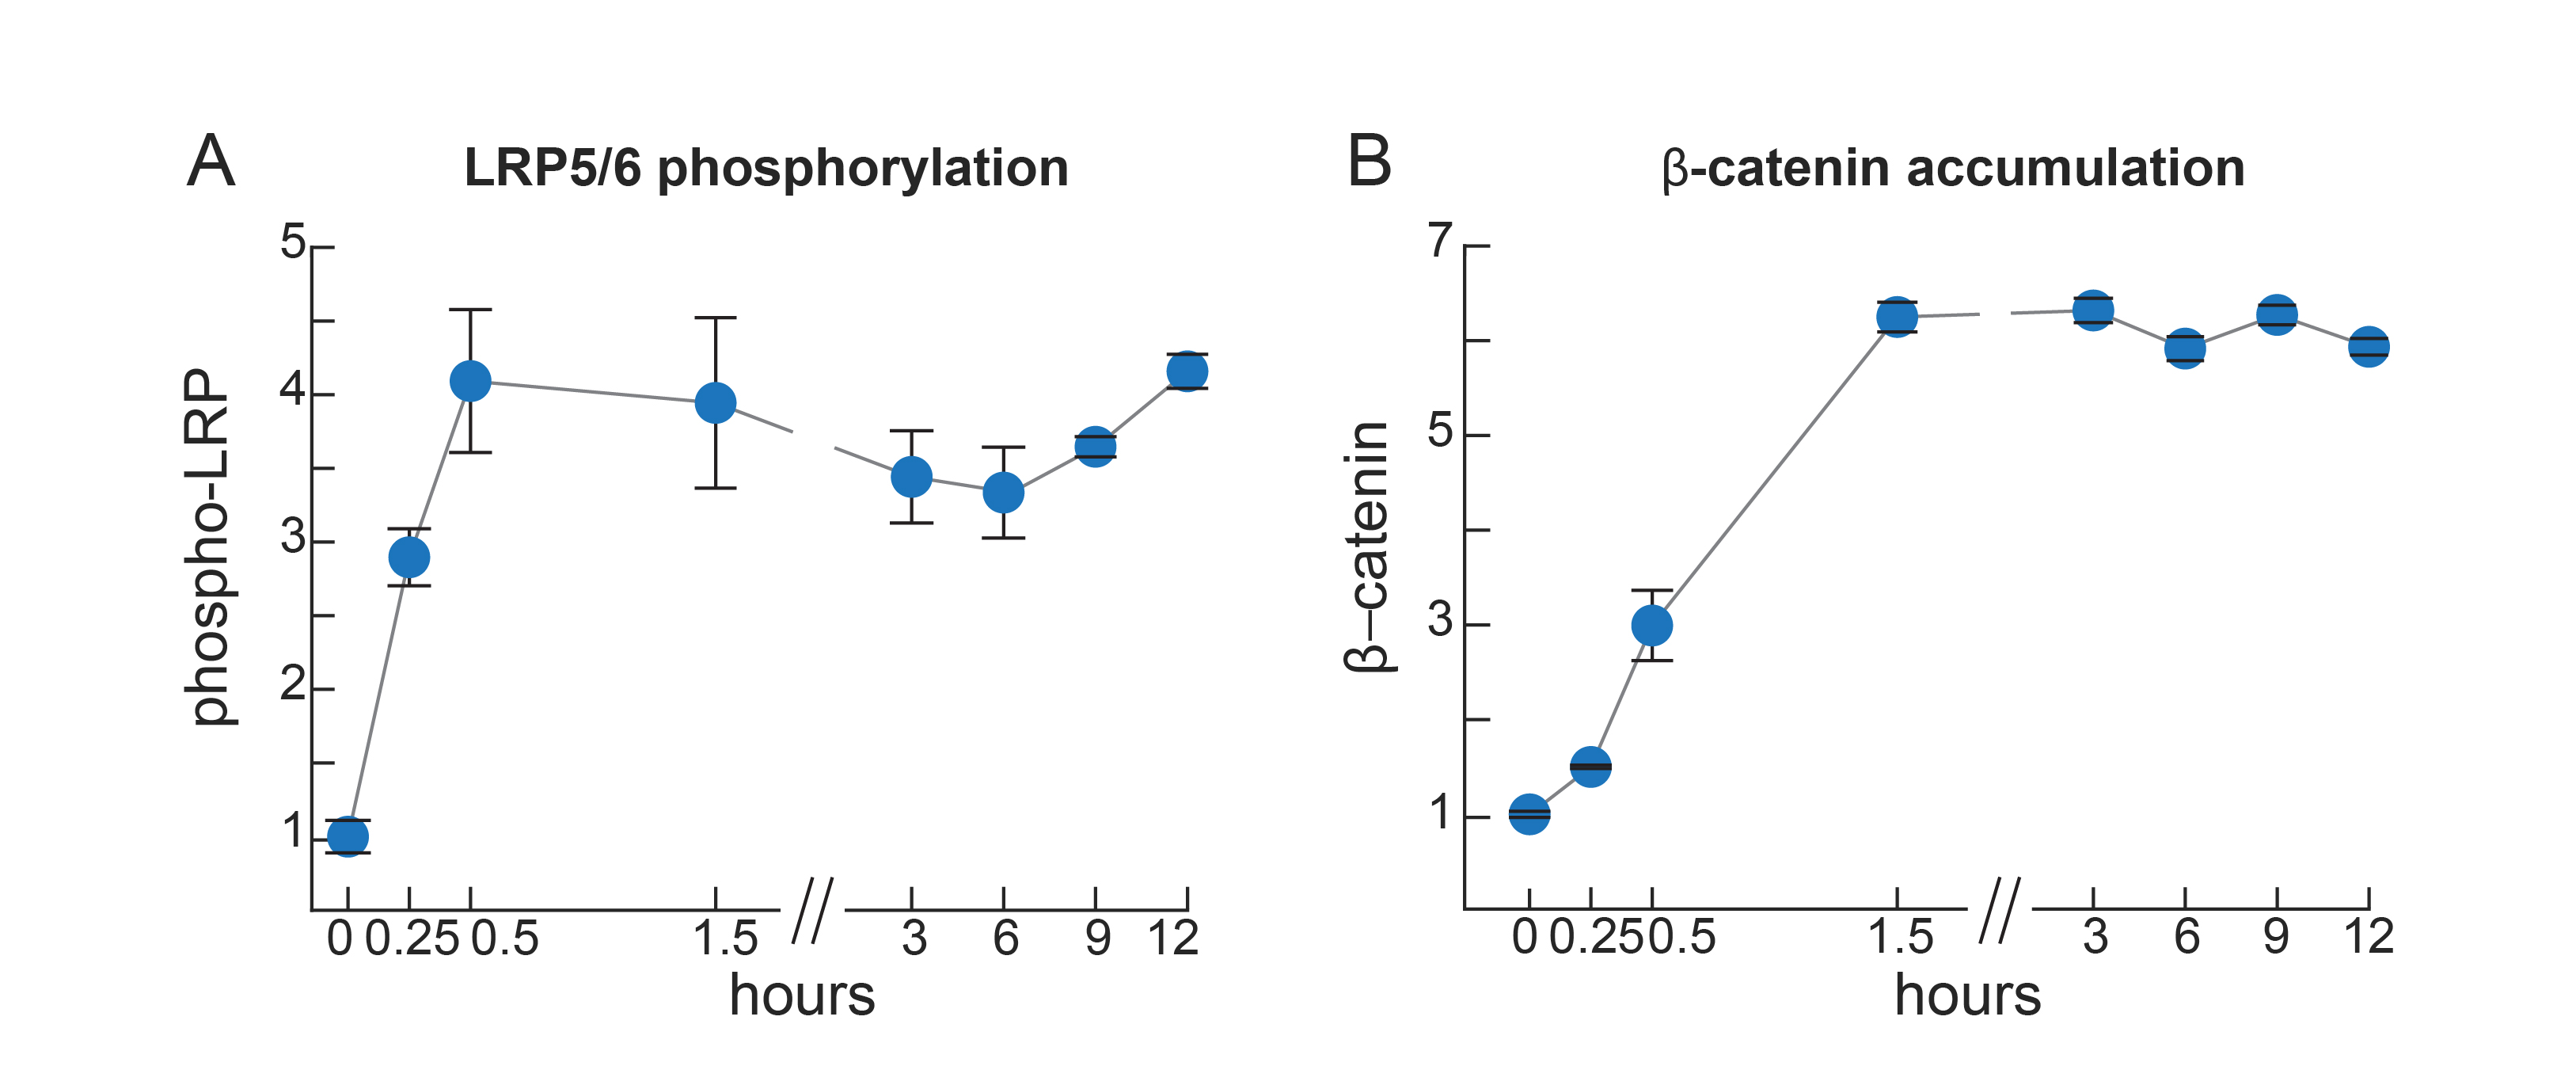

Supplement: supp [file elife-33617-supp-v2.zip › elife_poa_e33617_Figure_3_figure_supplement_1.jpg]

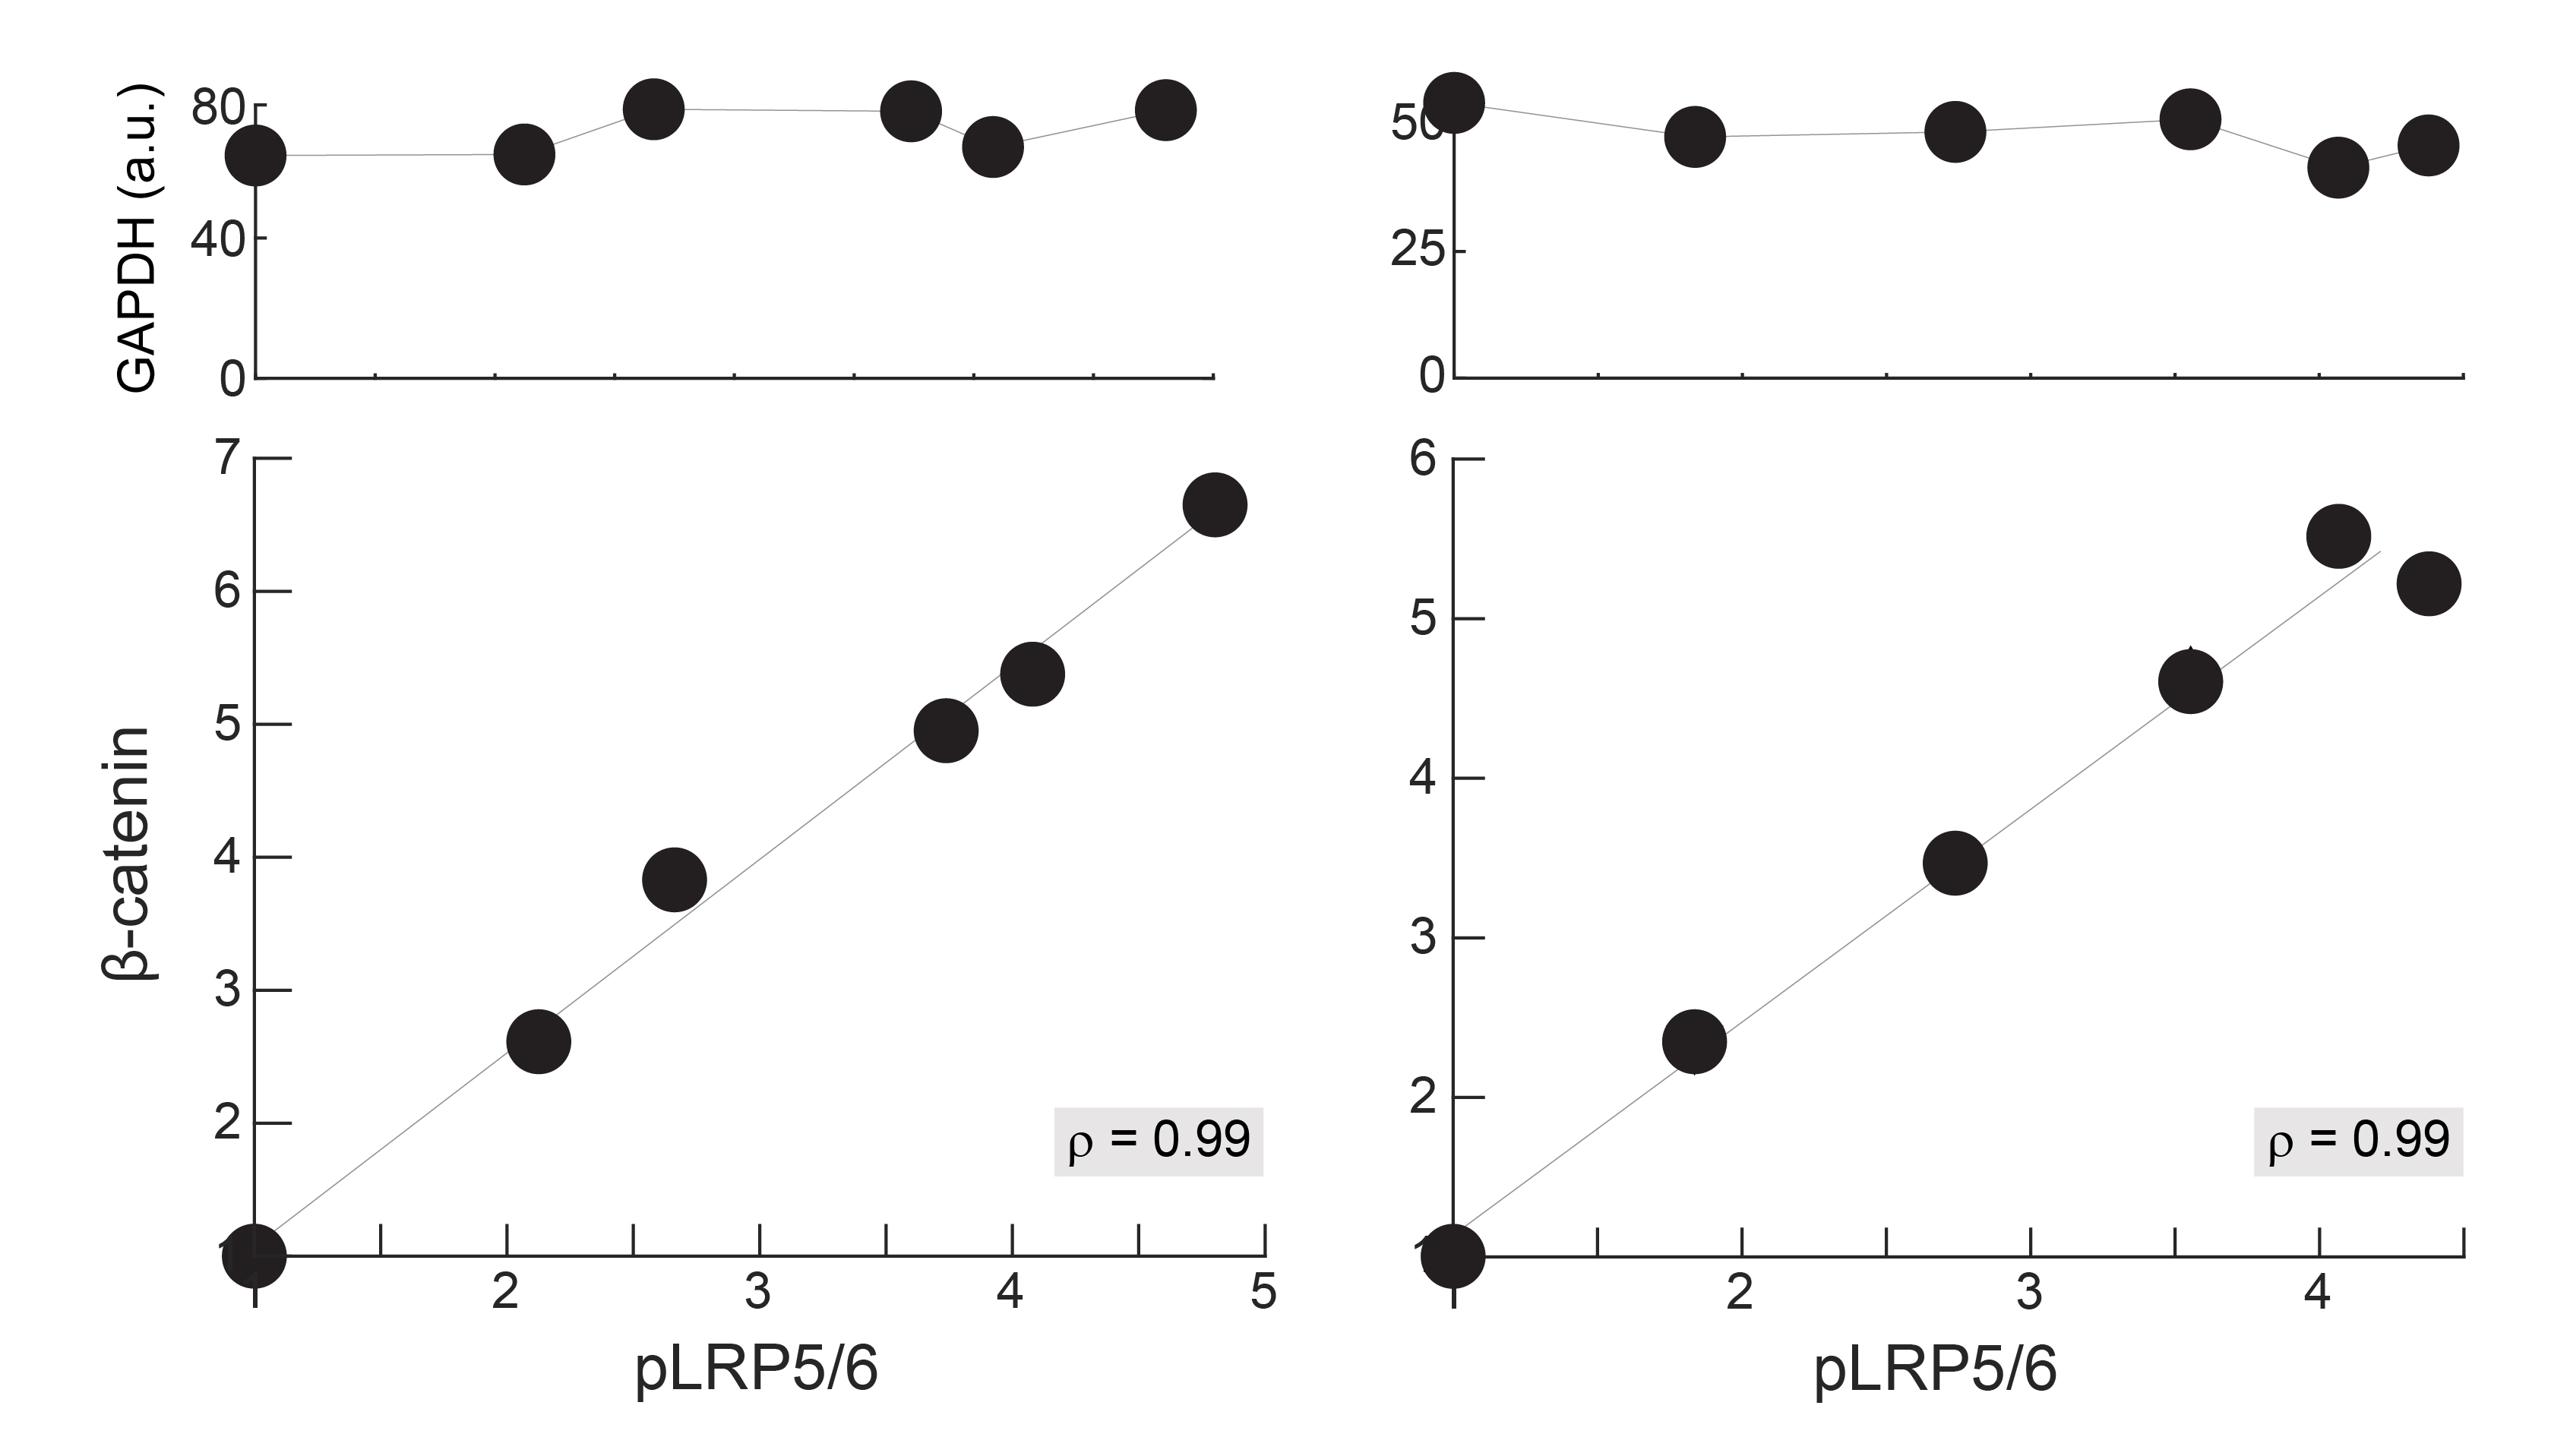

Supplement: supp [file elife-33617-supp-v2.zip › elife_poa_e33617_Figure_3_figure_supplement_8.jpg]

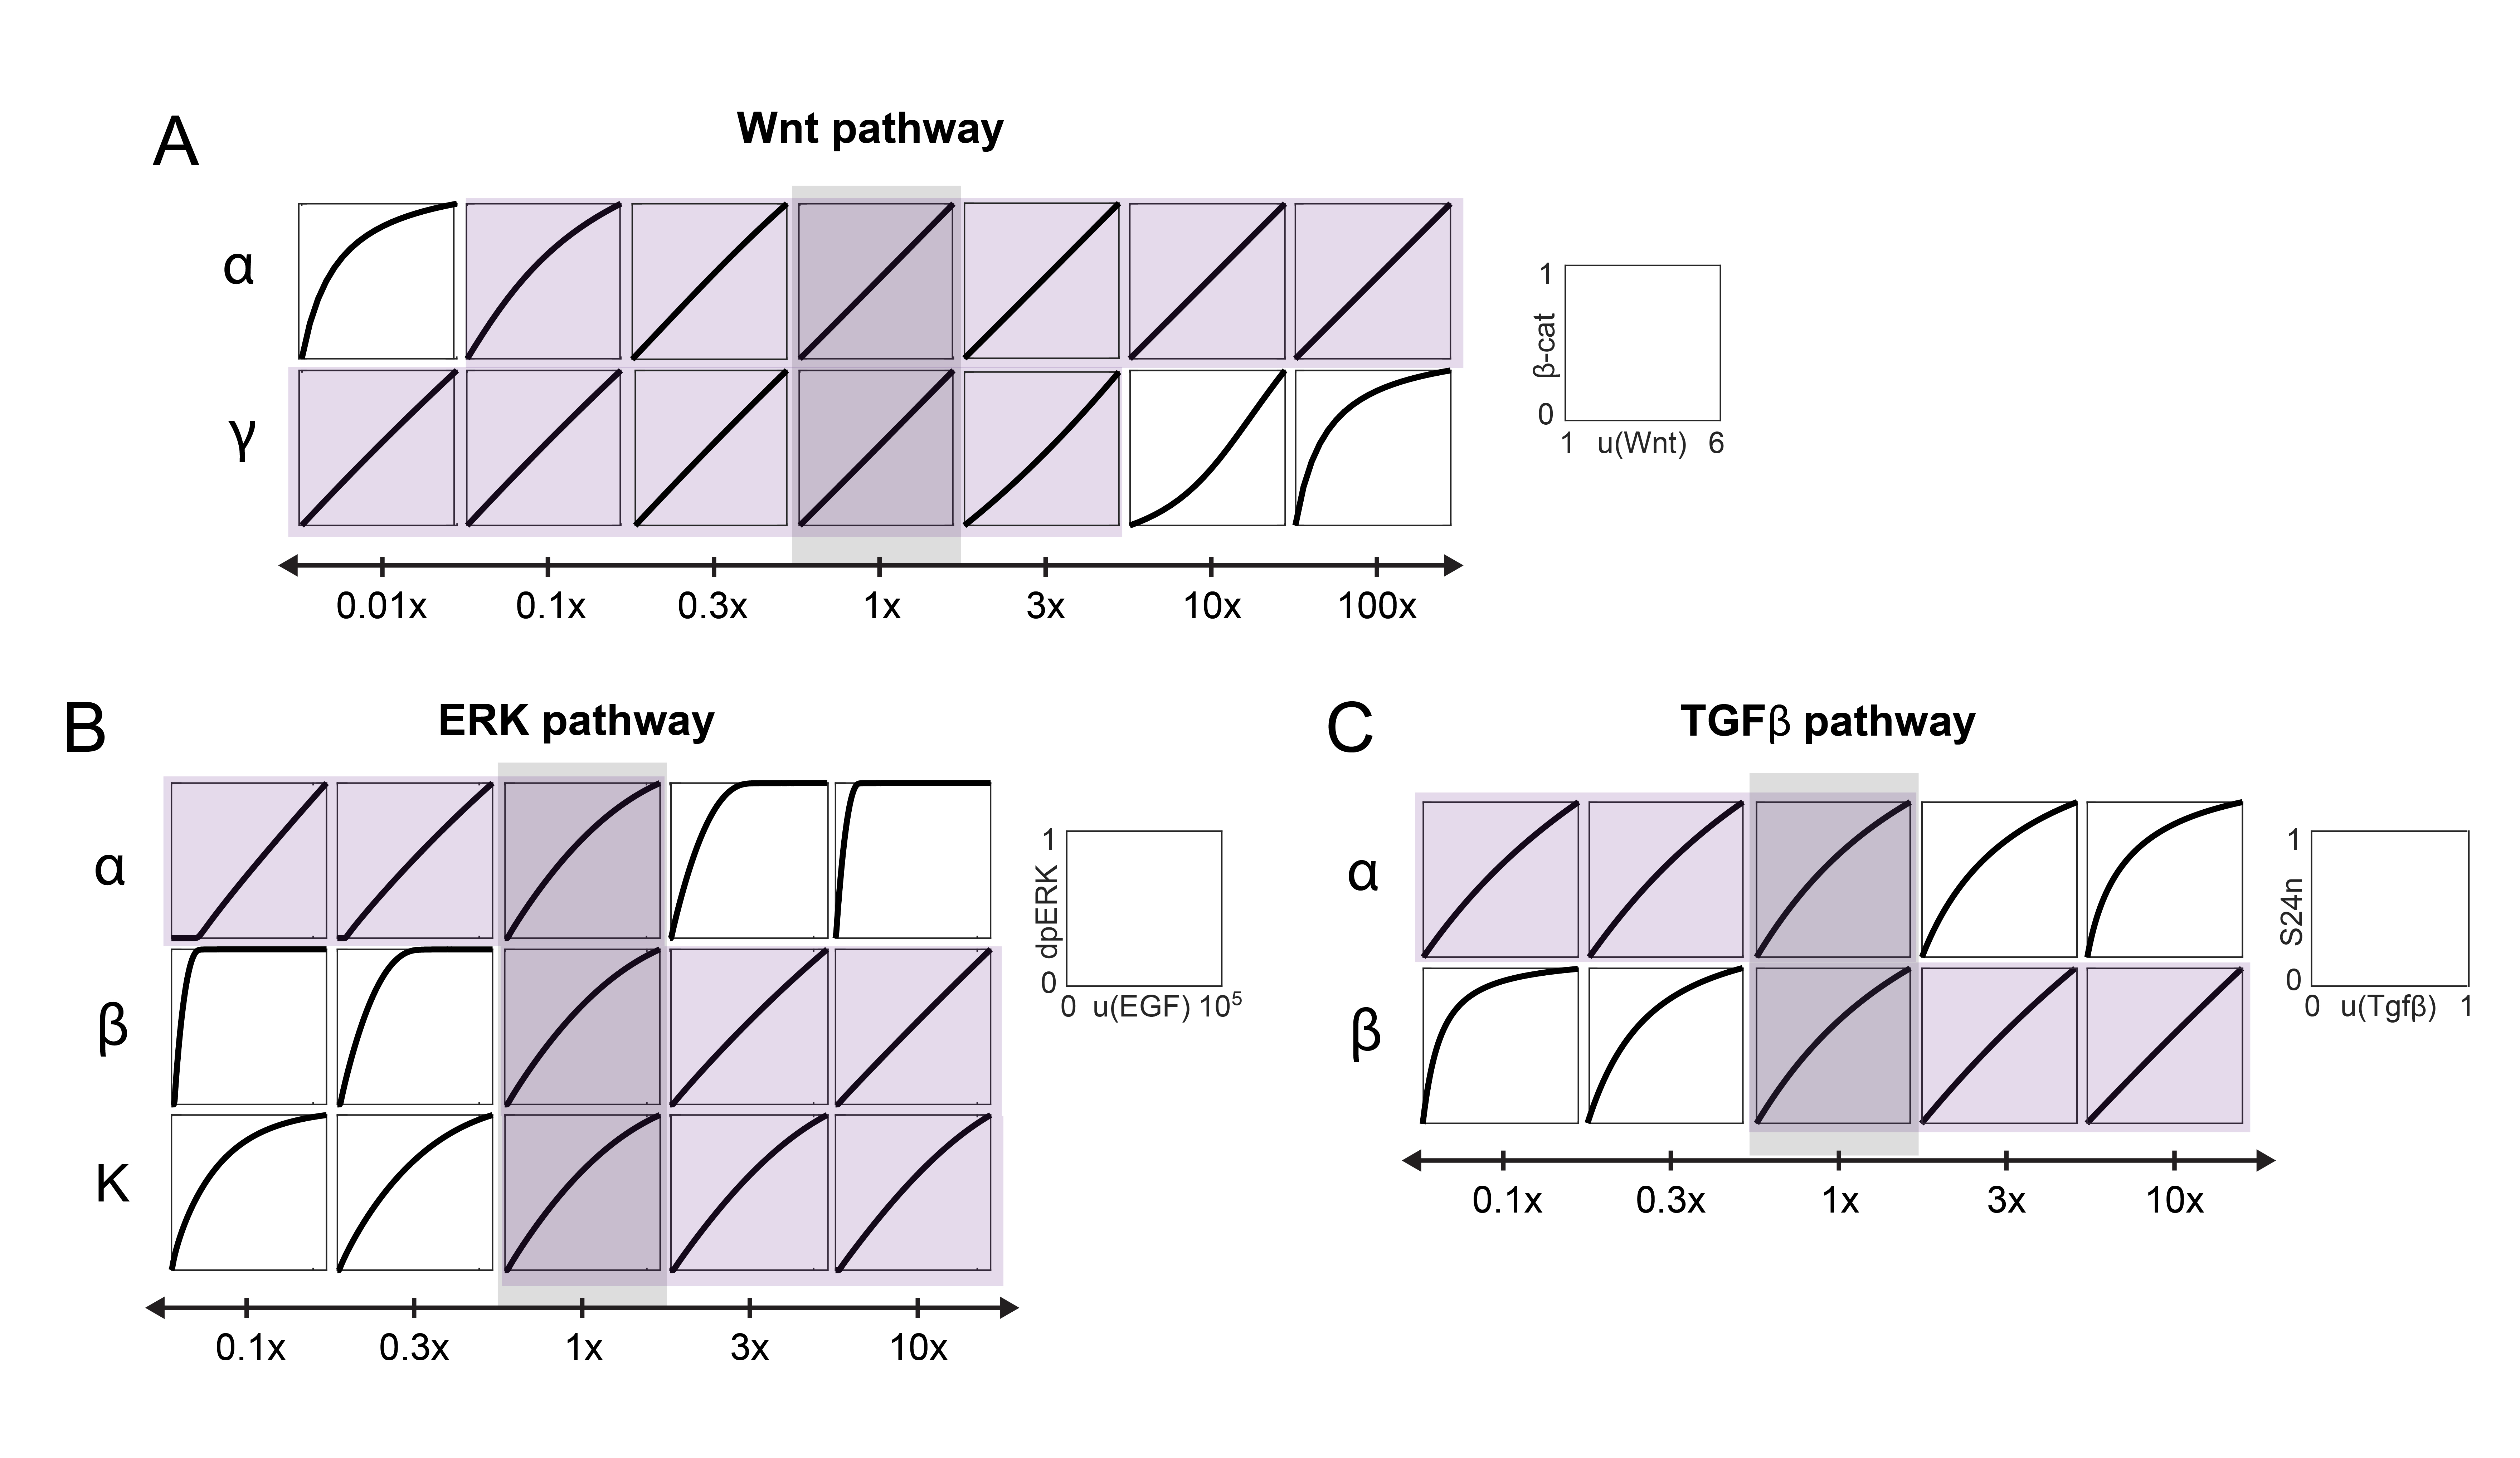

Supplement: supp [file elife-33617-supp-v2.zip › elife_poa_e33617_Figure_2_figure_supplement_6.jpg]

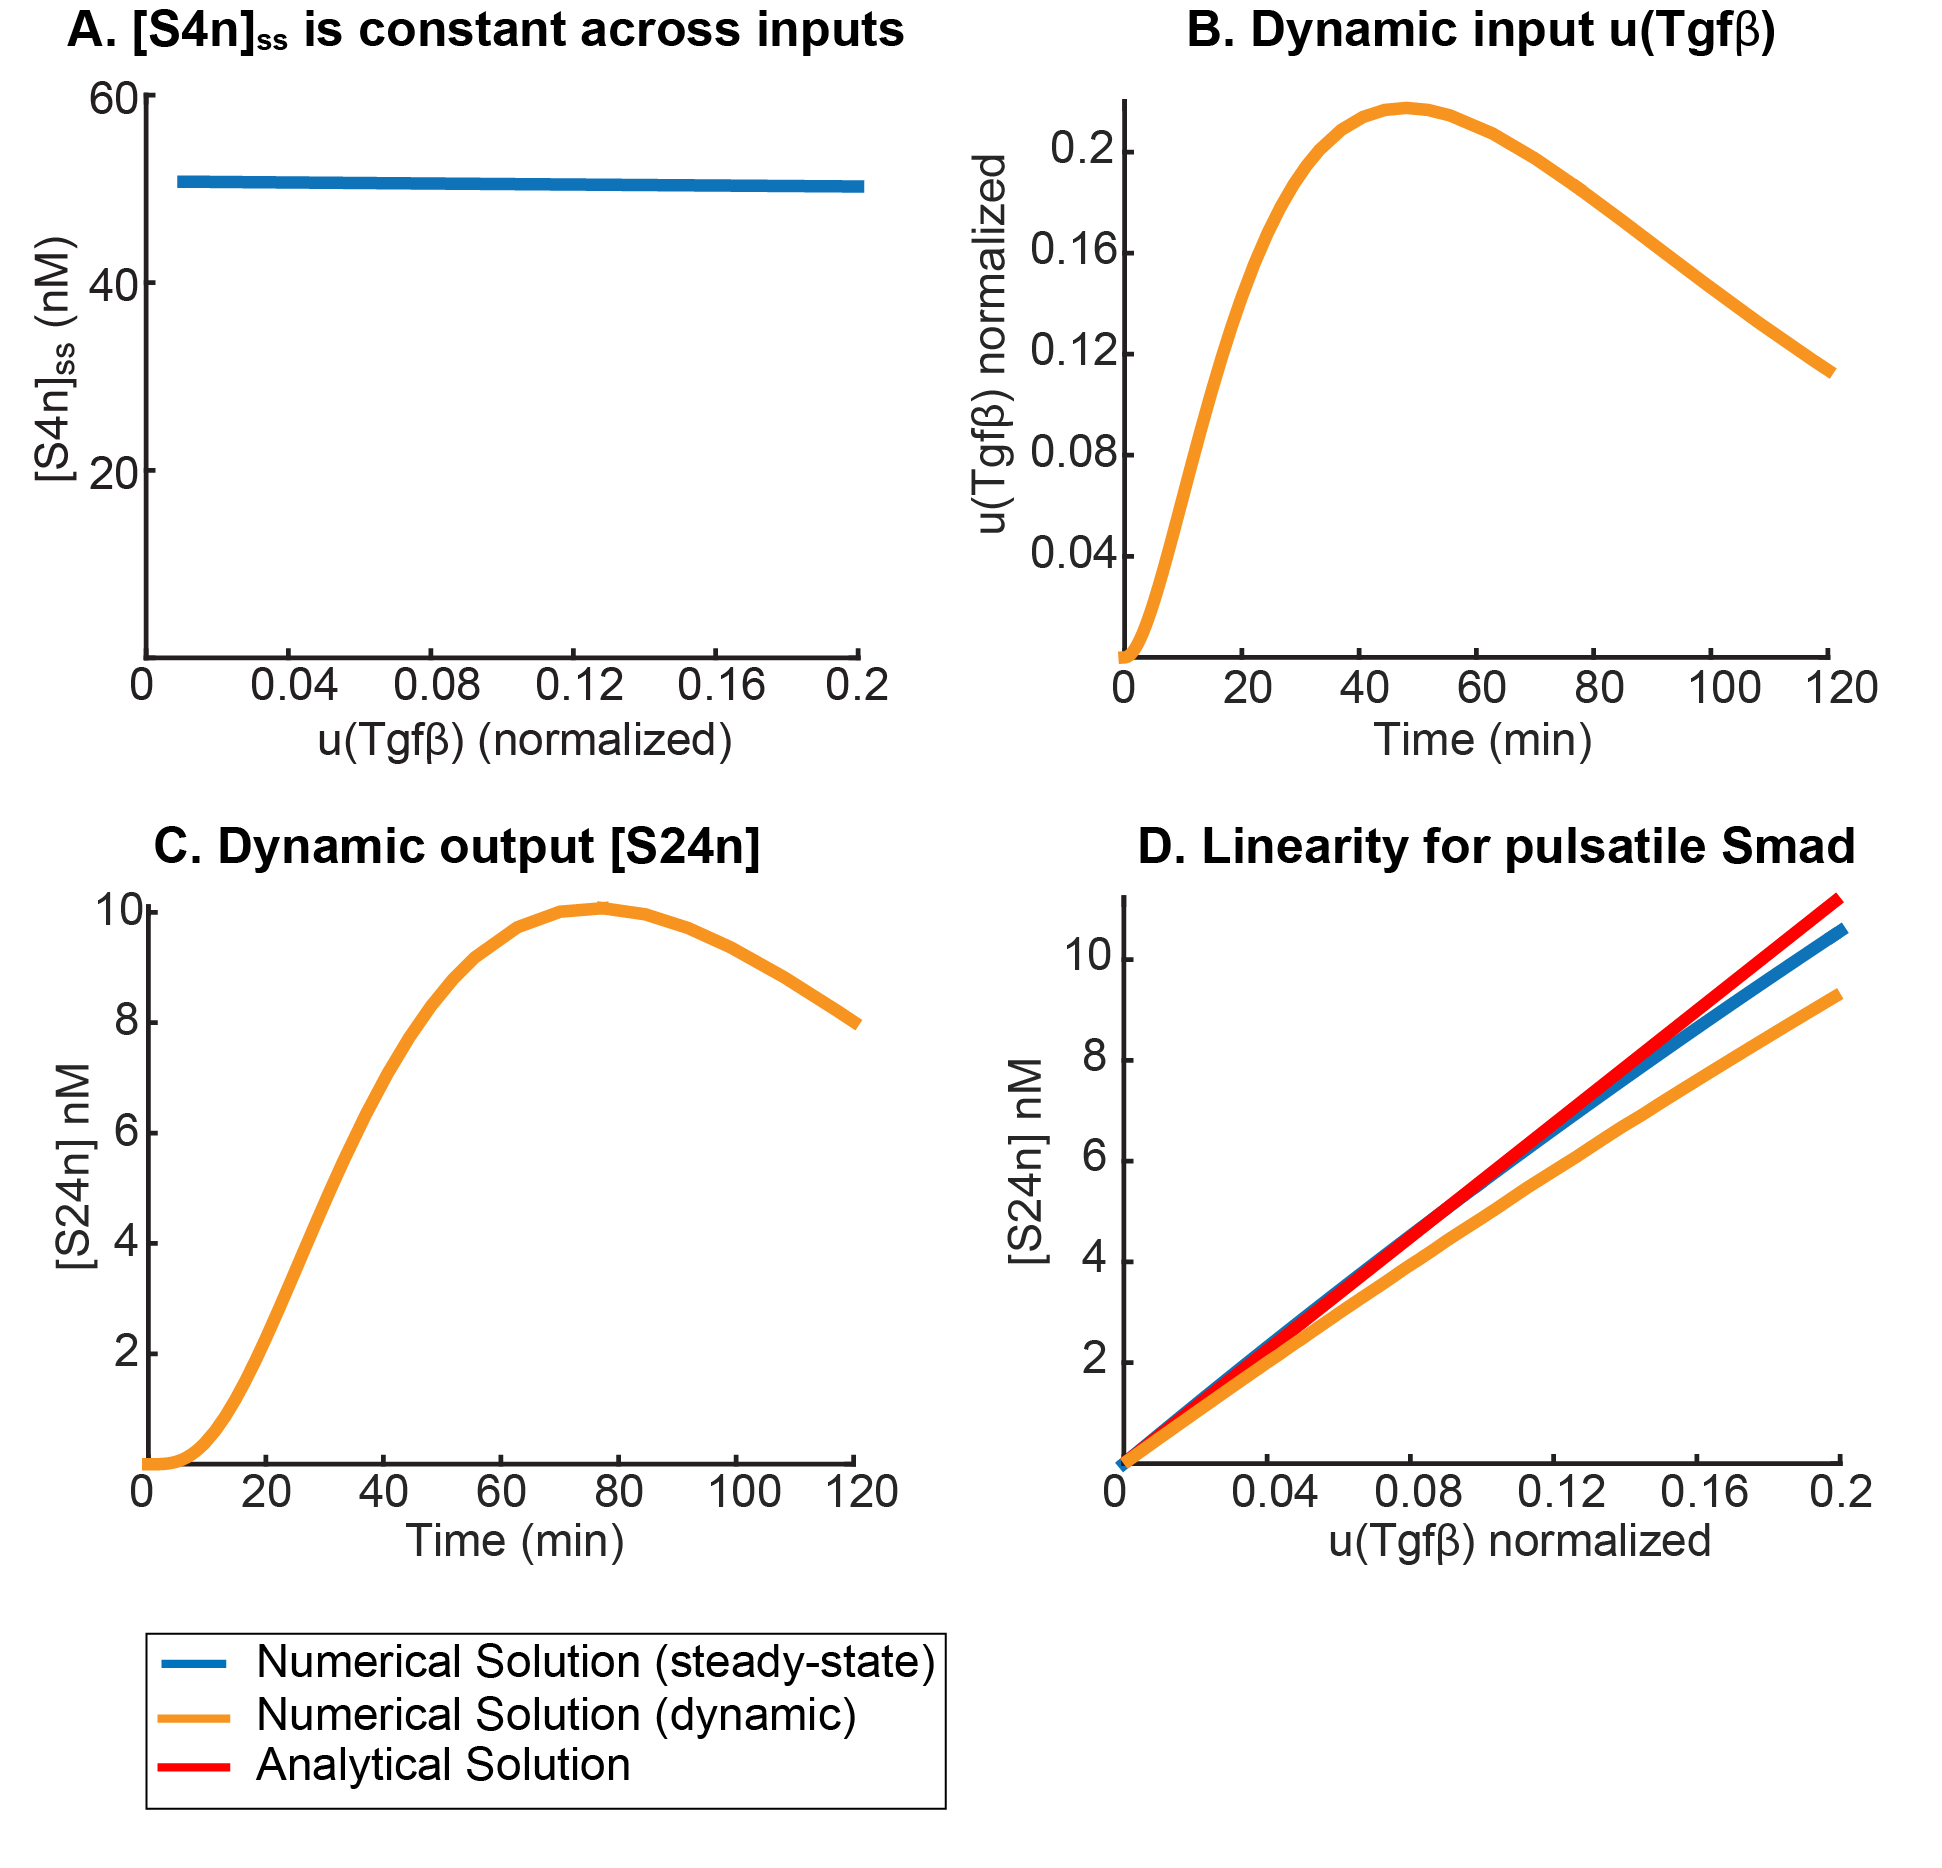

Supplement: supp [file elife-33617-supp-v2.zip › elife_poa_e33617_Figure_2_figure_supplement_3.jpg]

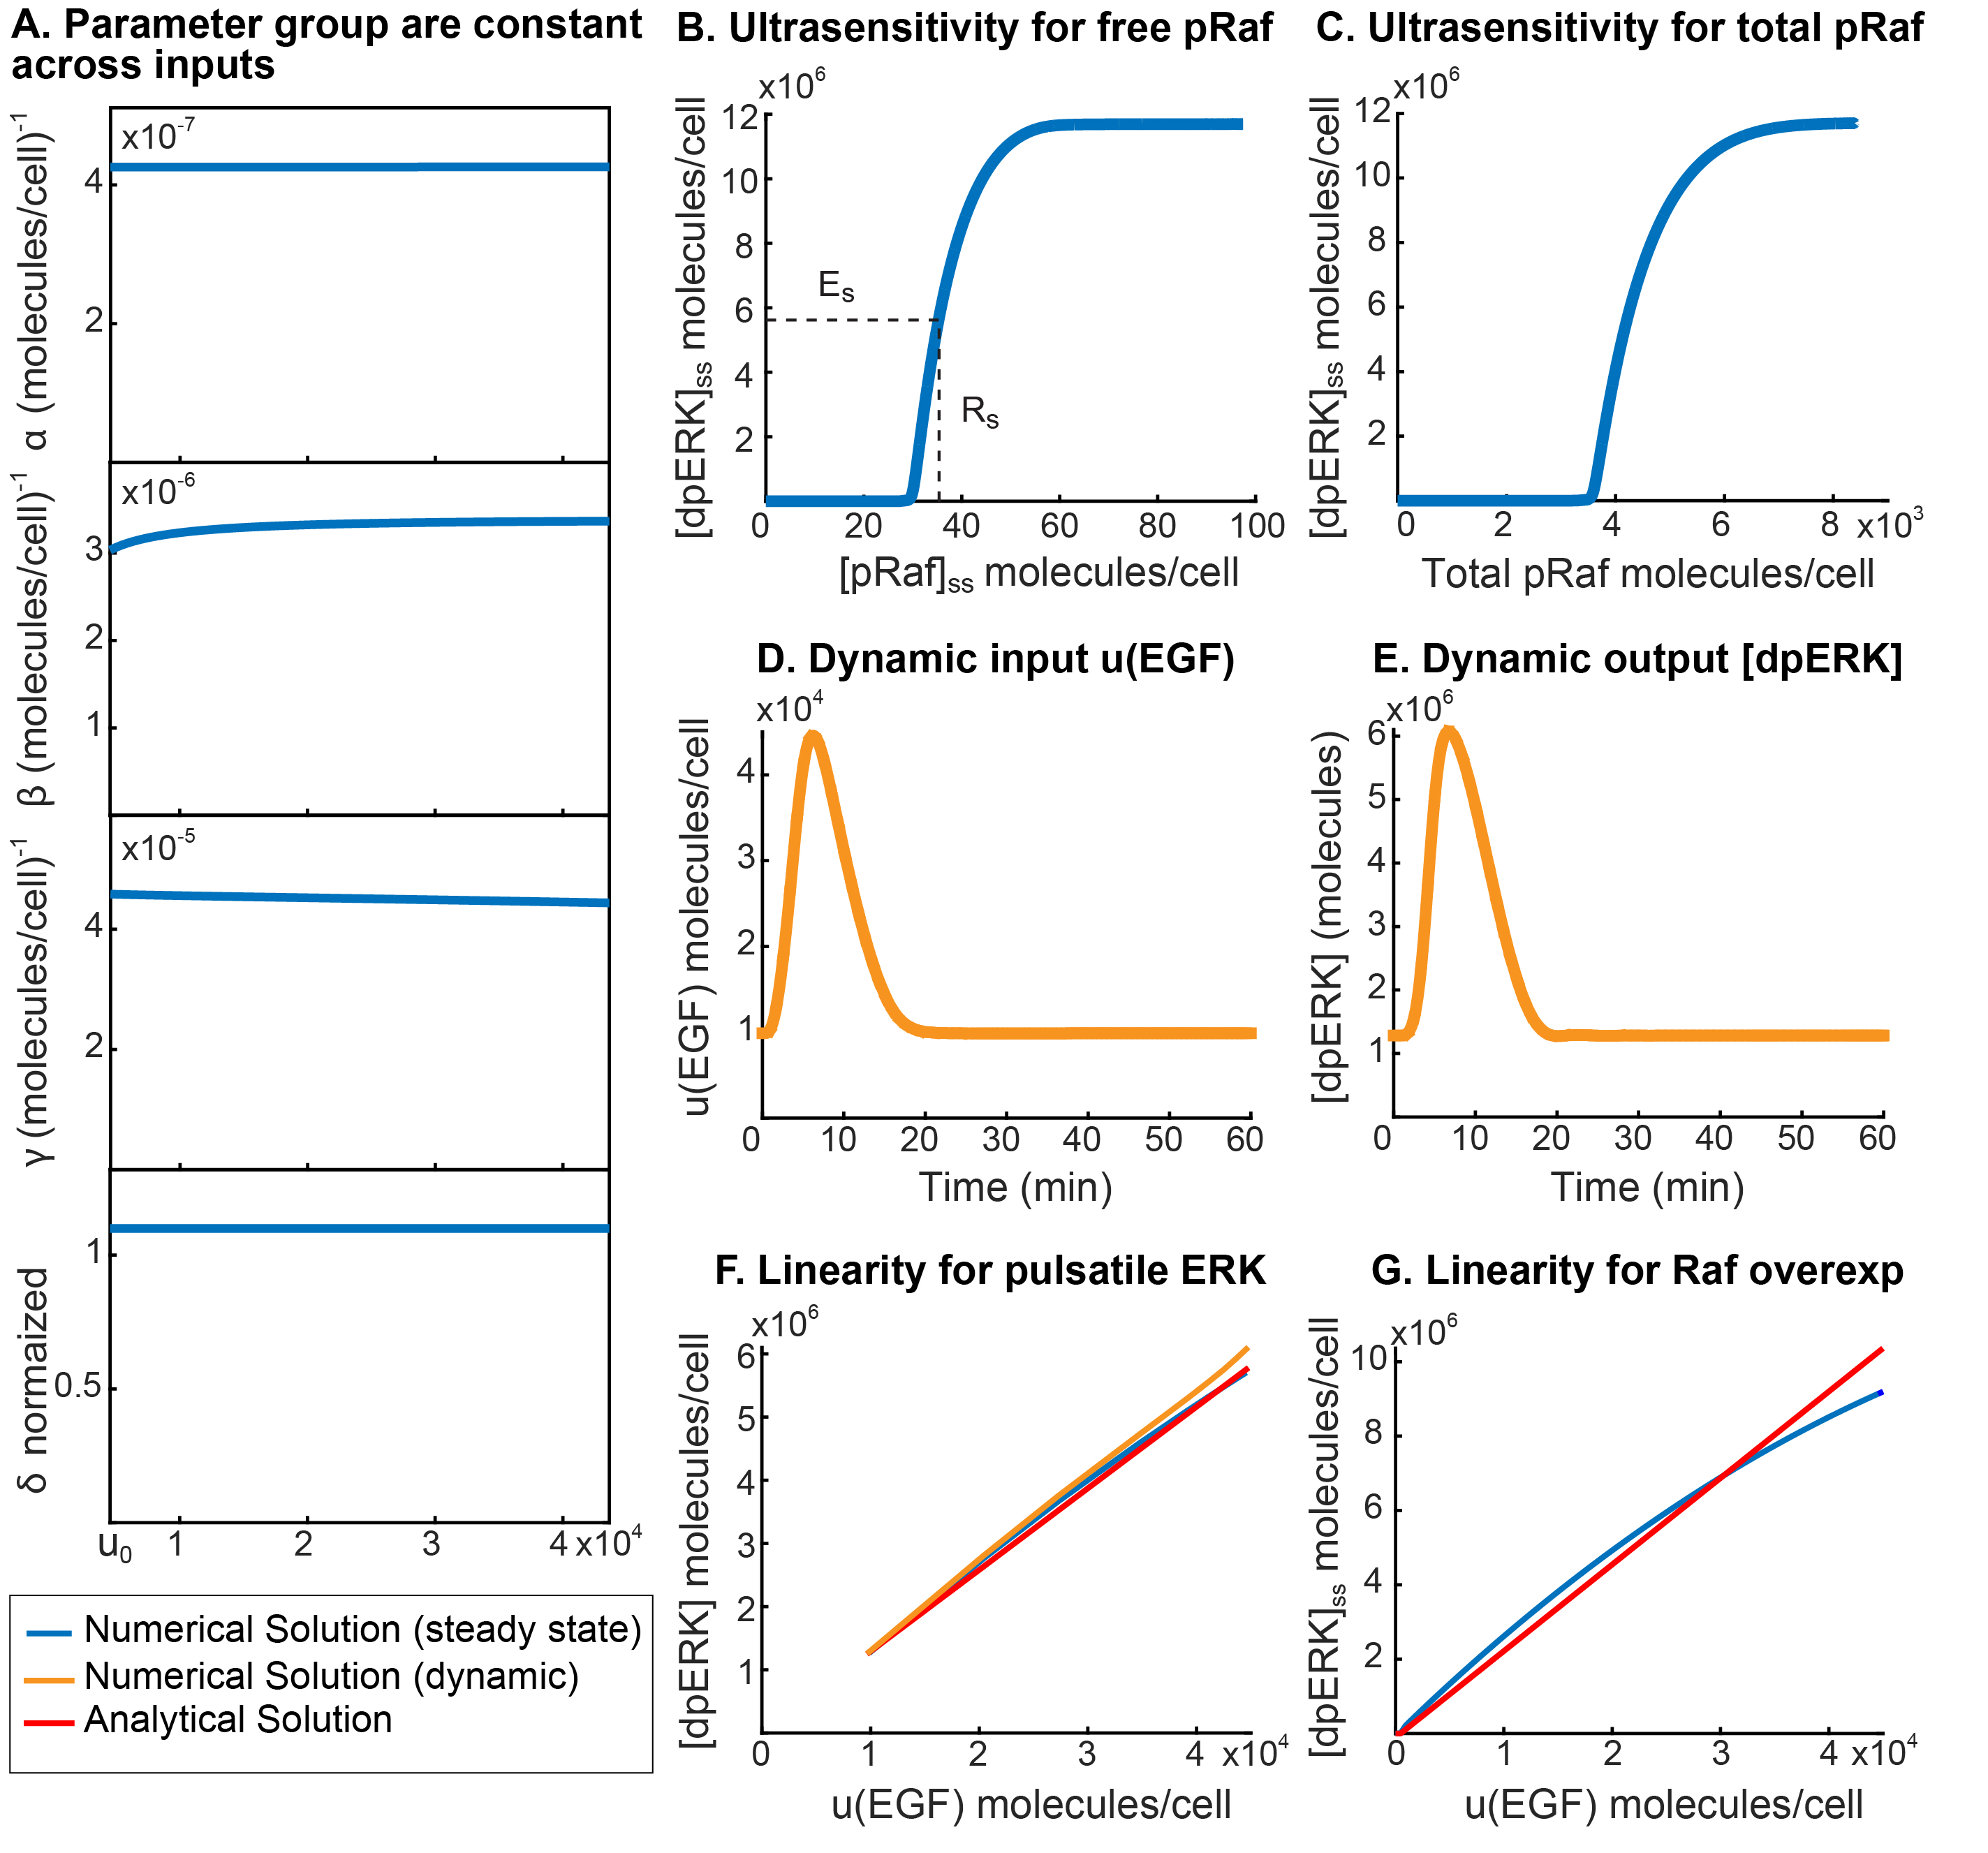

Supplement: supp [file elife-33617-supp-v2.zip › elife_poa_e33617_Figure_2_figure_supplement_1.jpg]

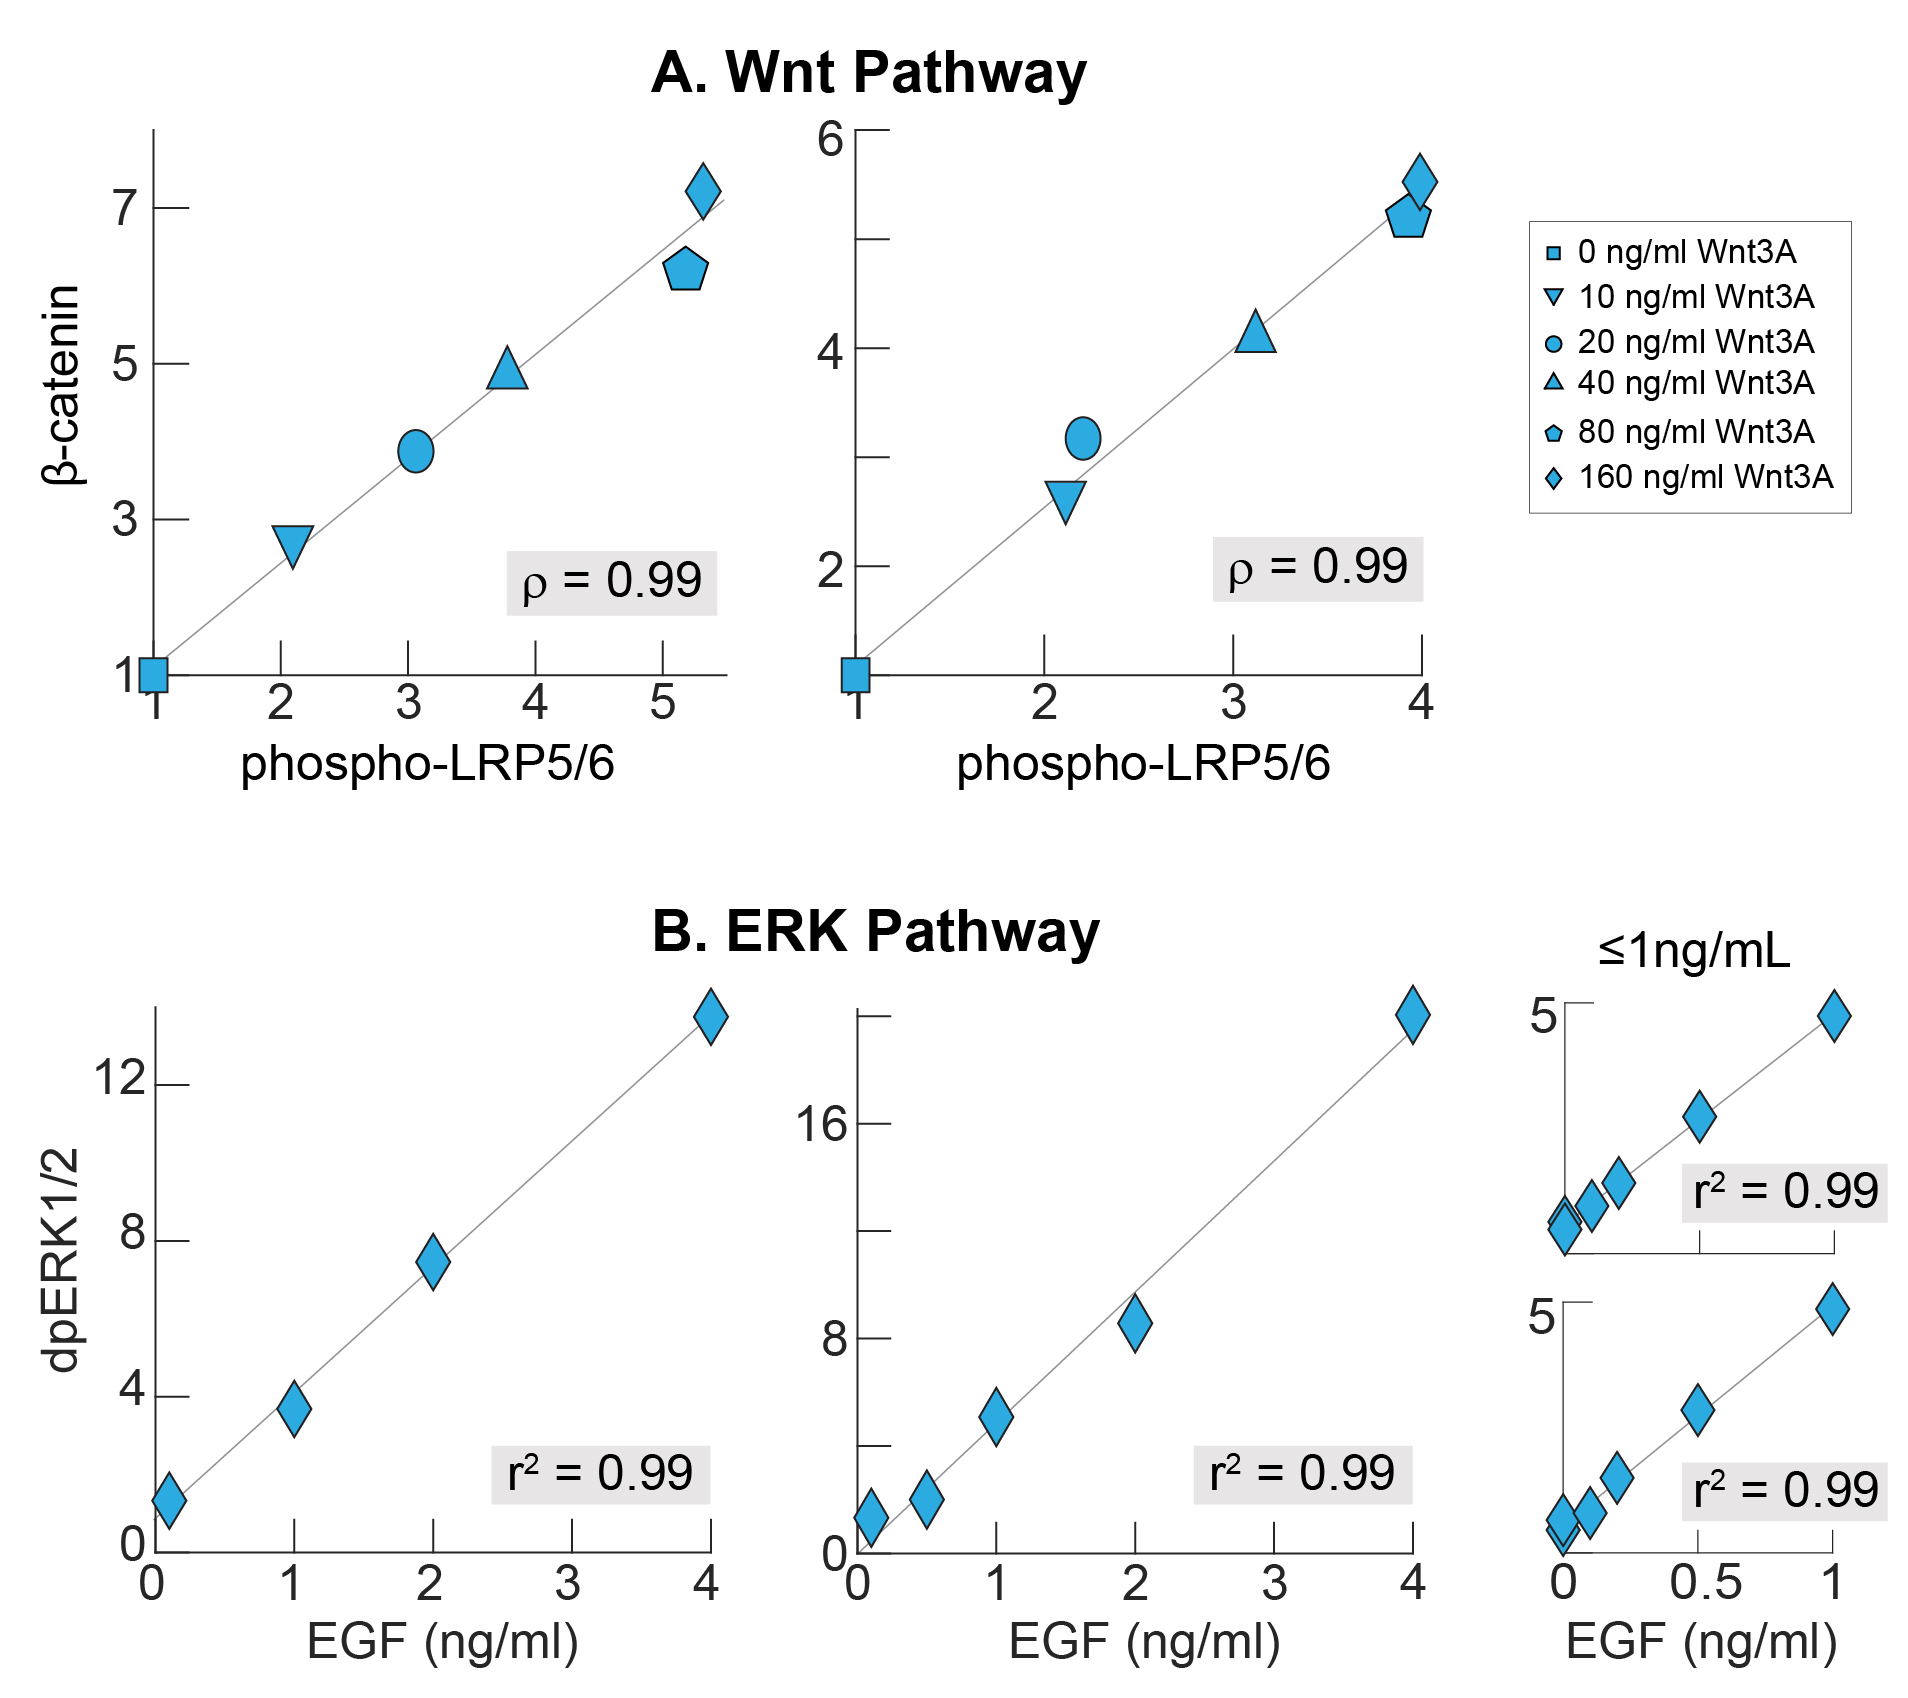

Supplement: supp [file elife-33617-supp-v2.zip › elife_poa_e33617_Figure_3_figure_supplement_9.jpg]

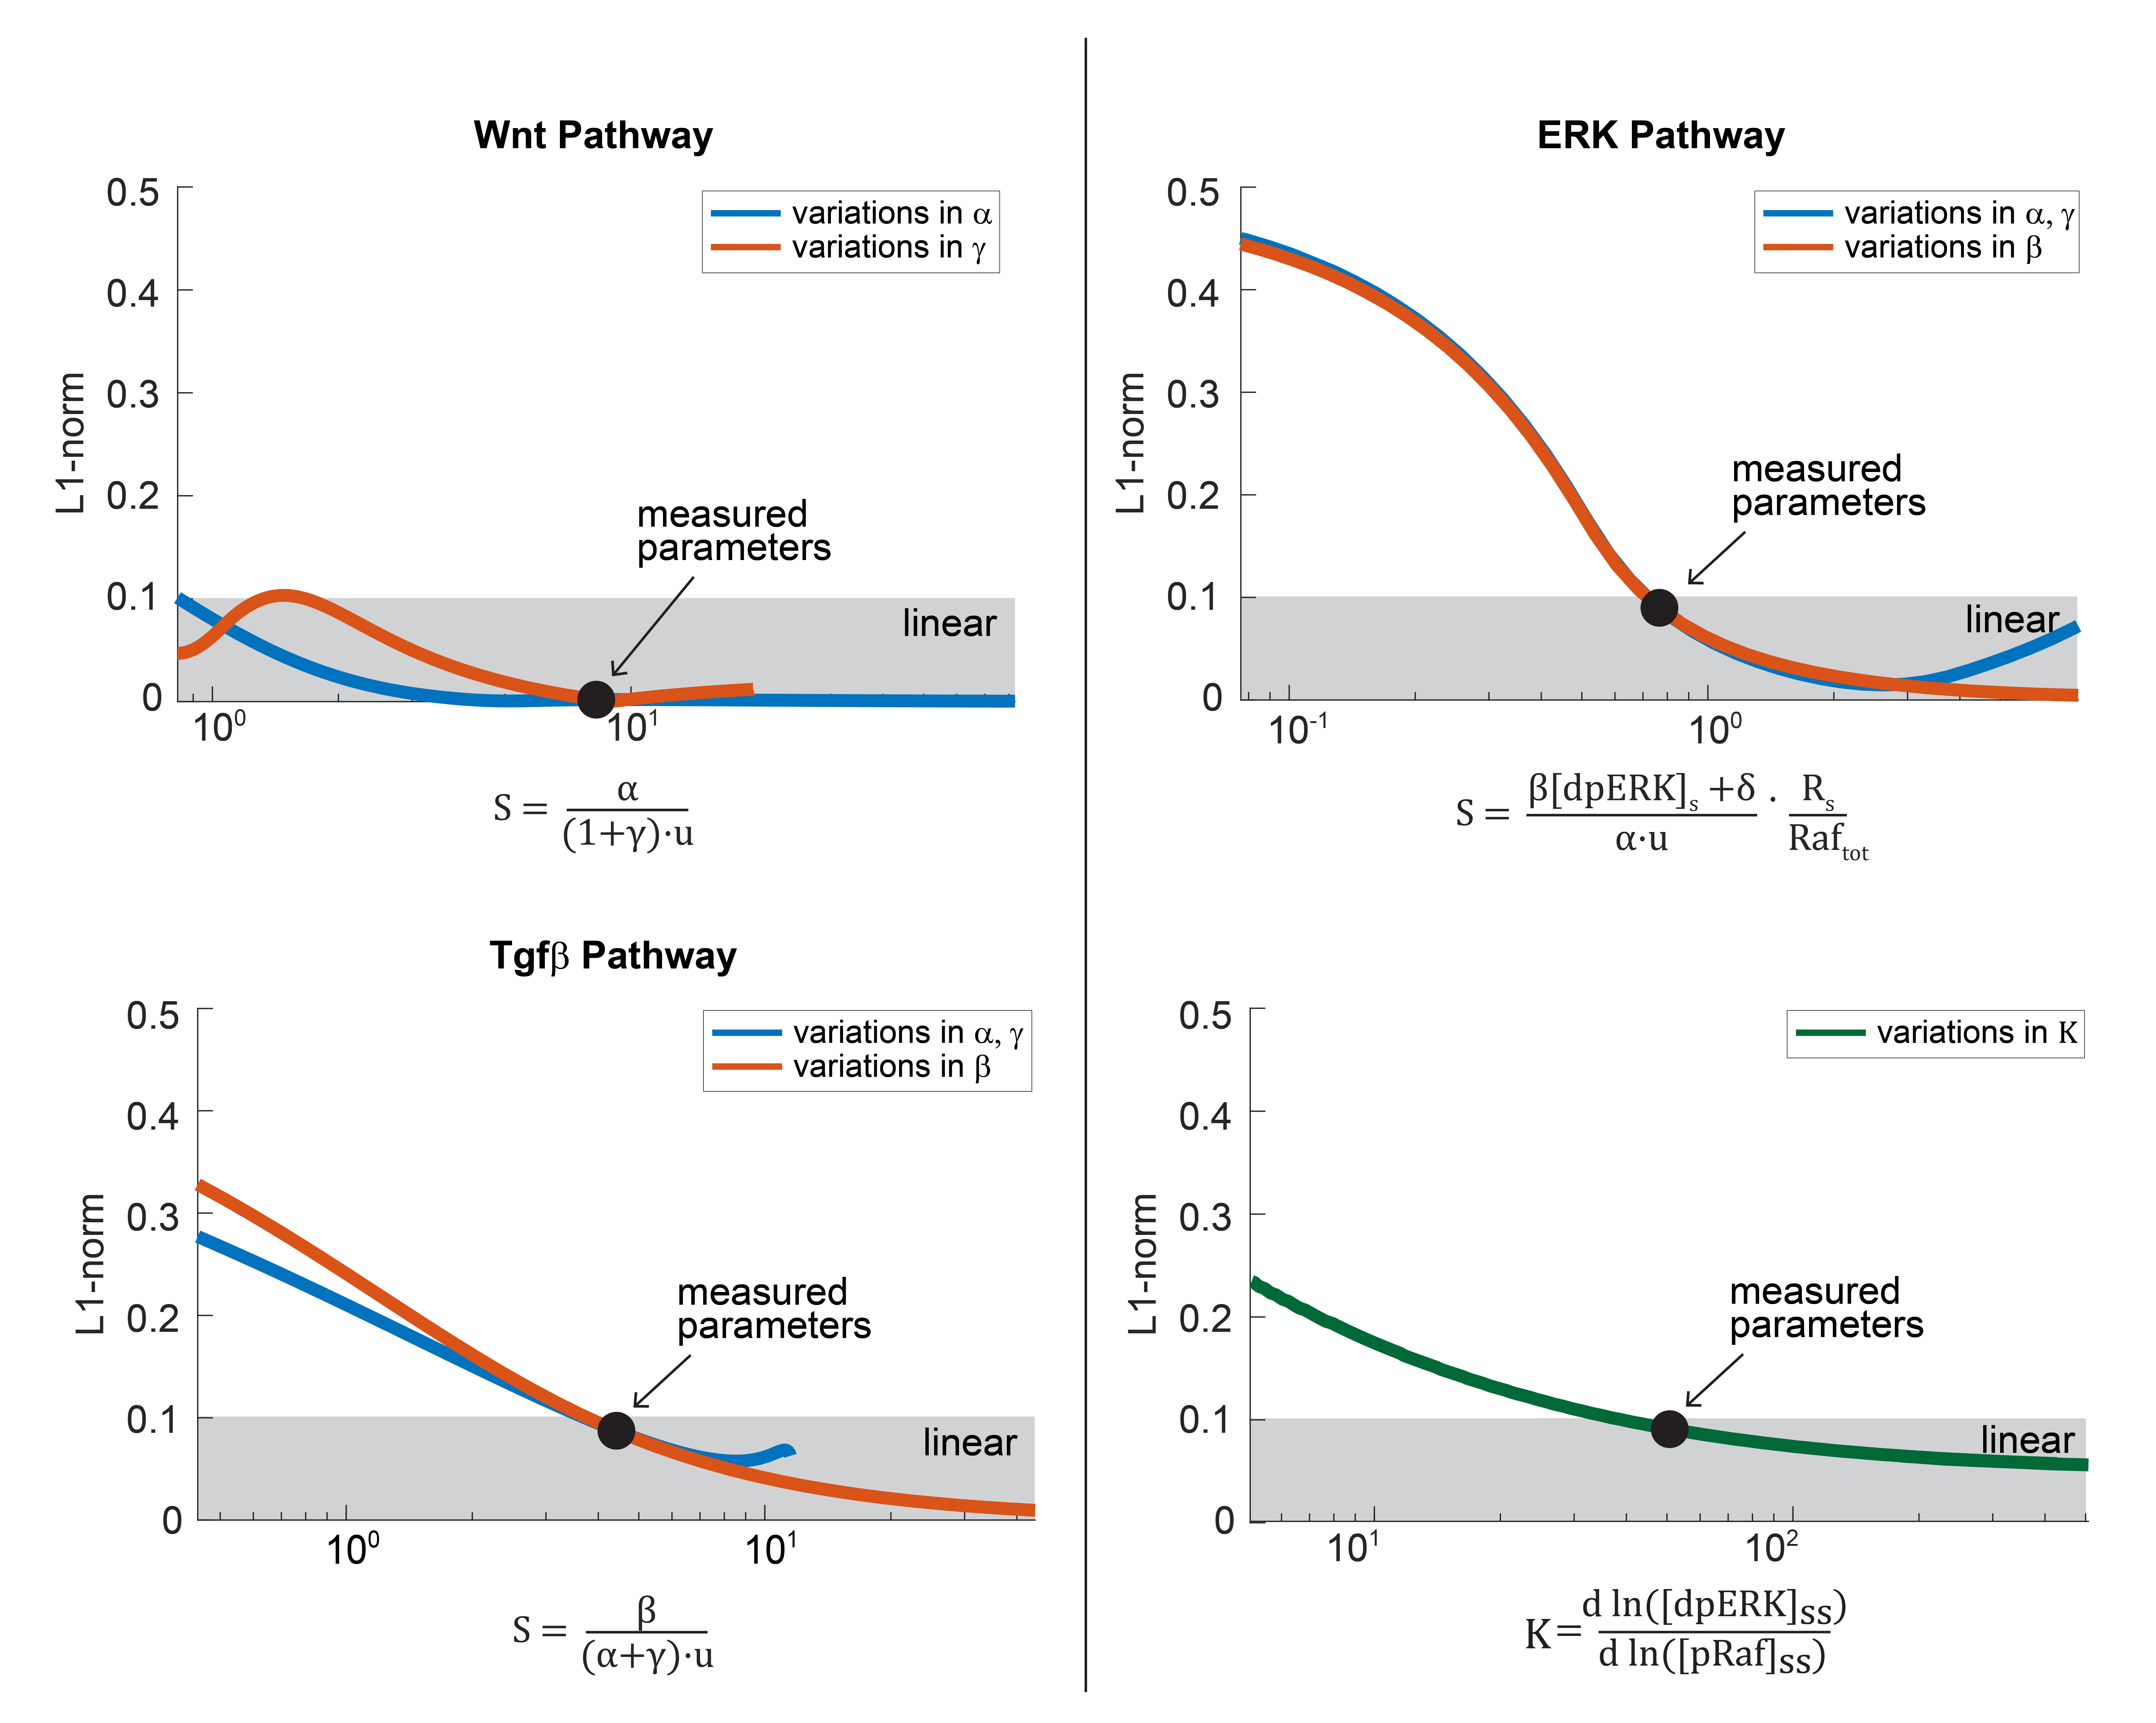

Supplement: supp [file elife-33617-supp-v2.zip › elife_poa_e33617_Figure_2_figure_supplement_5.jpg]

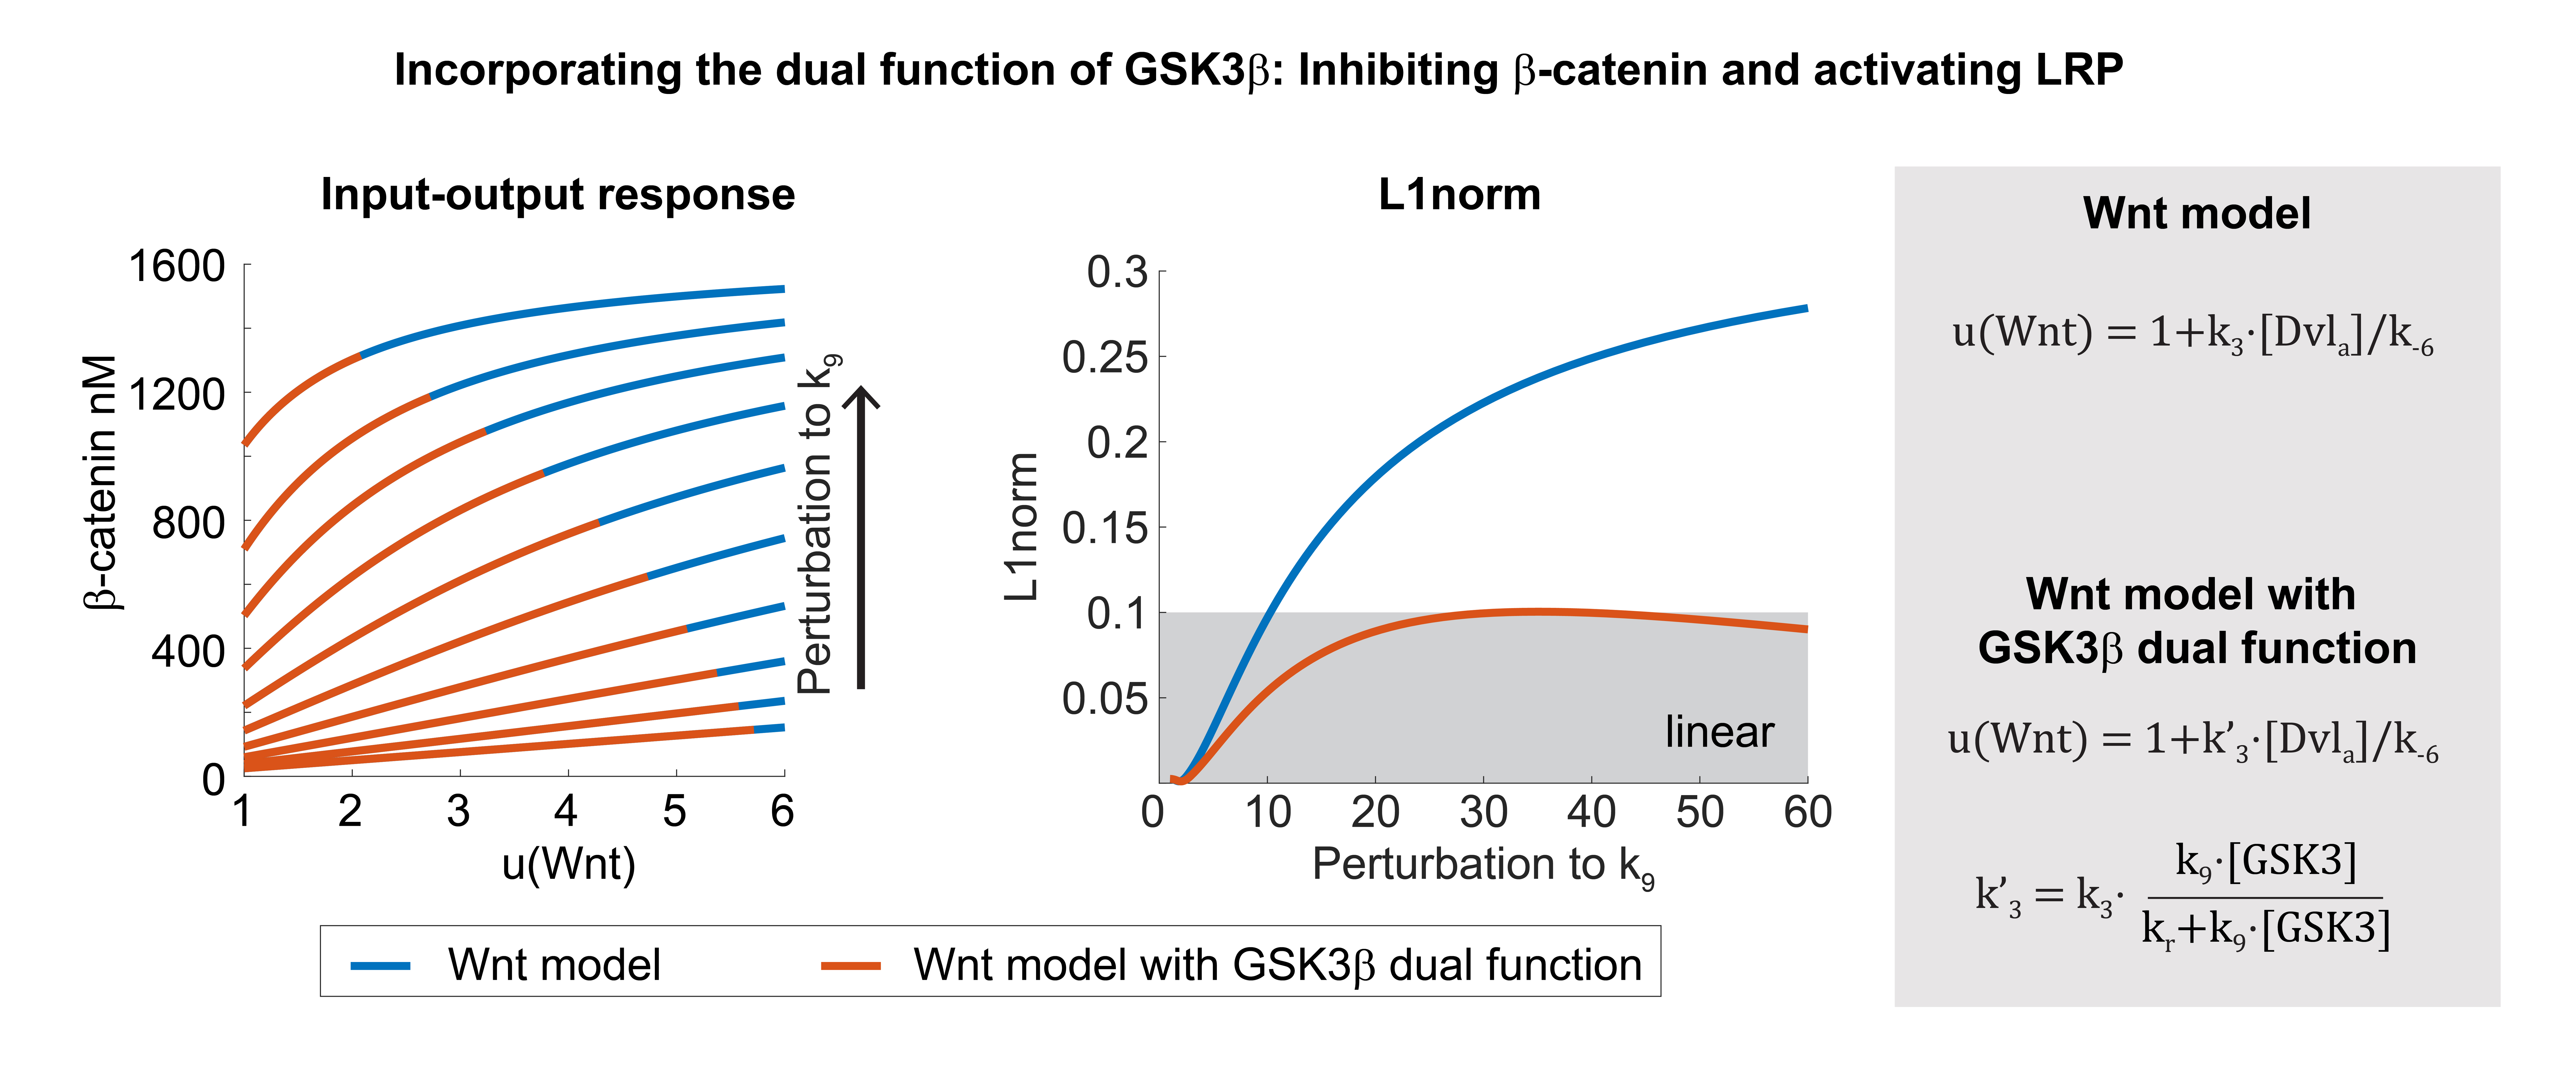

Supplement: supp [file elife-33617-supp-v2.zip › elife_poa_e33617_Figure_2_figure_supplement_4.jpg]

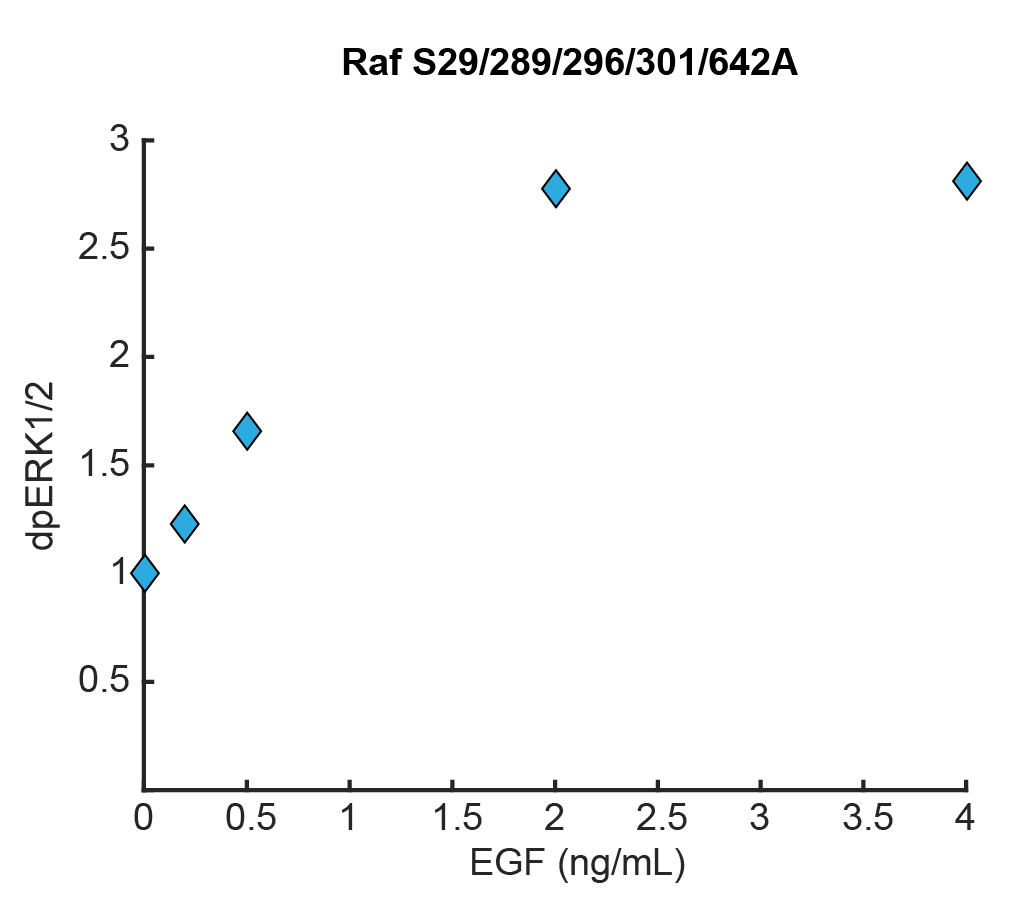

Supplement: supp [file elife-33617-supp-v2.zip › elife_poa_e33617_Figure_3_figure_supplement_6.jpg]

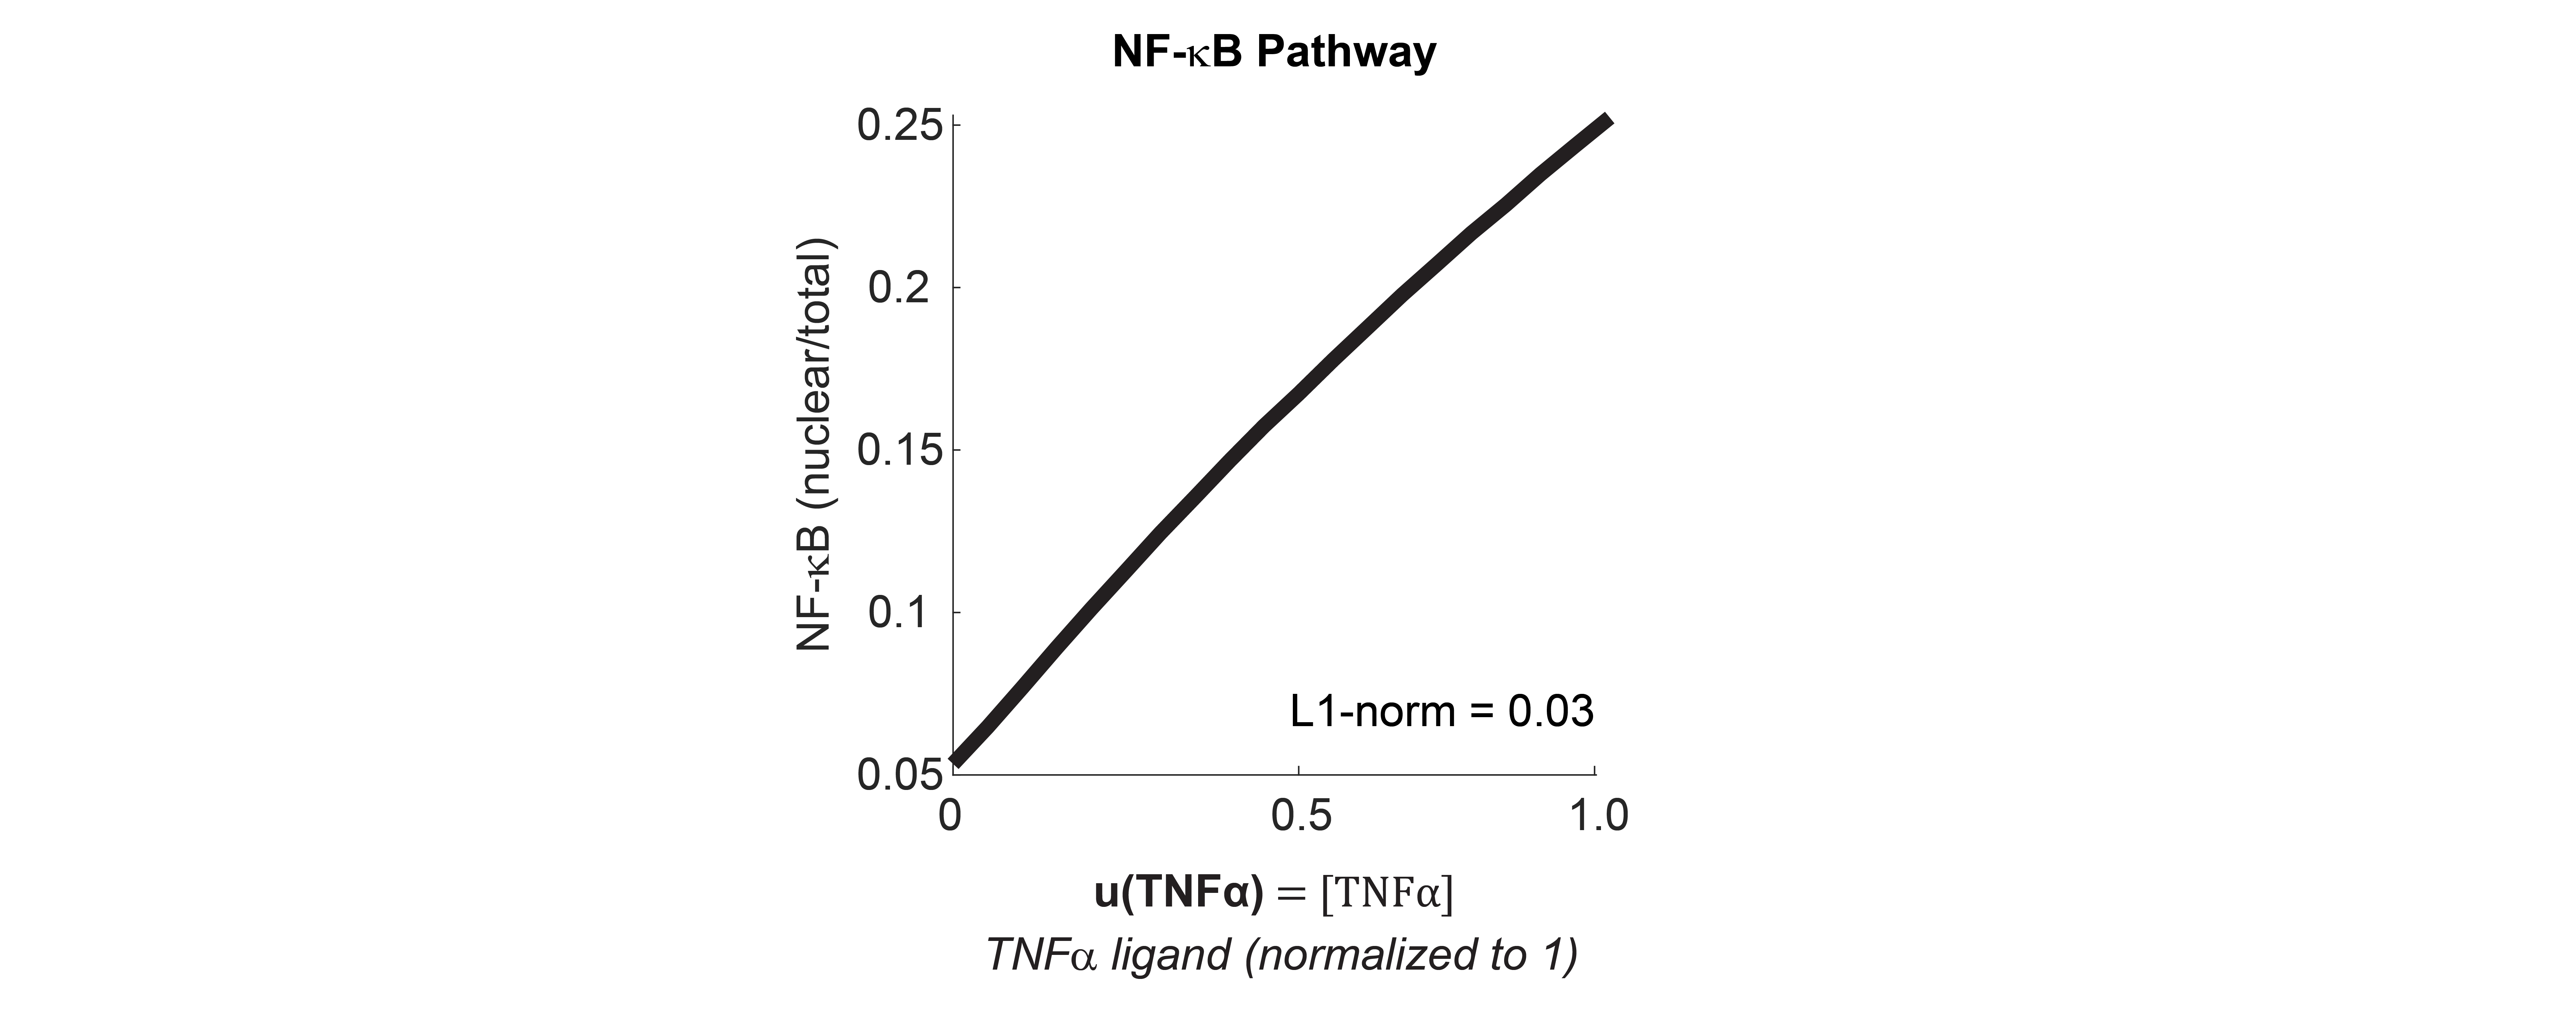

Supplement: supp [file elife-33617-supp-v2.zip › elife_poa_e33617_Figure_2_figure_supplement_7.jpg]

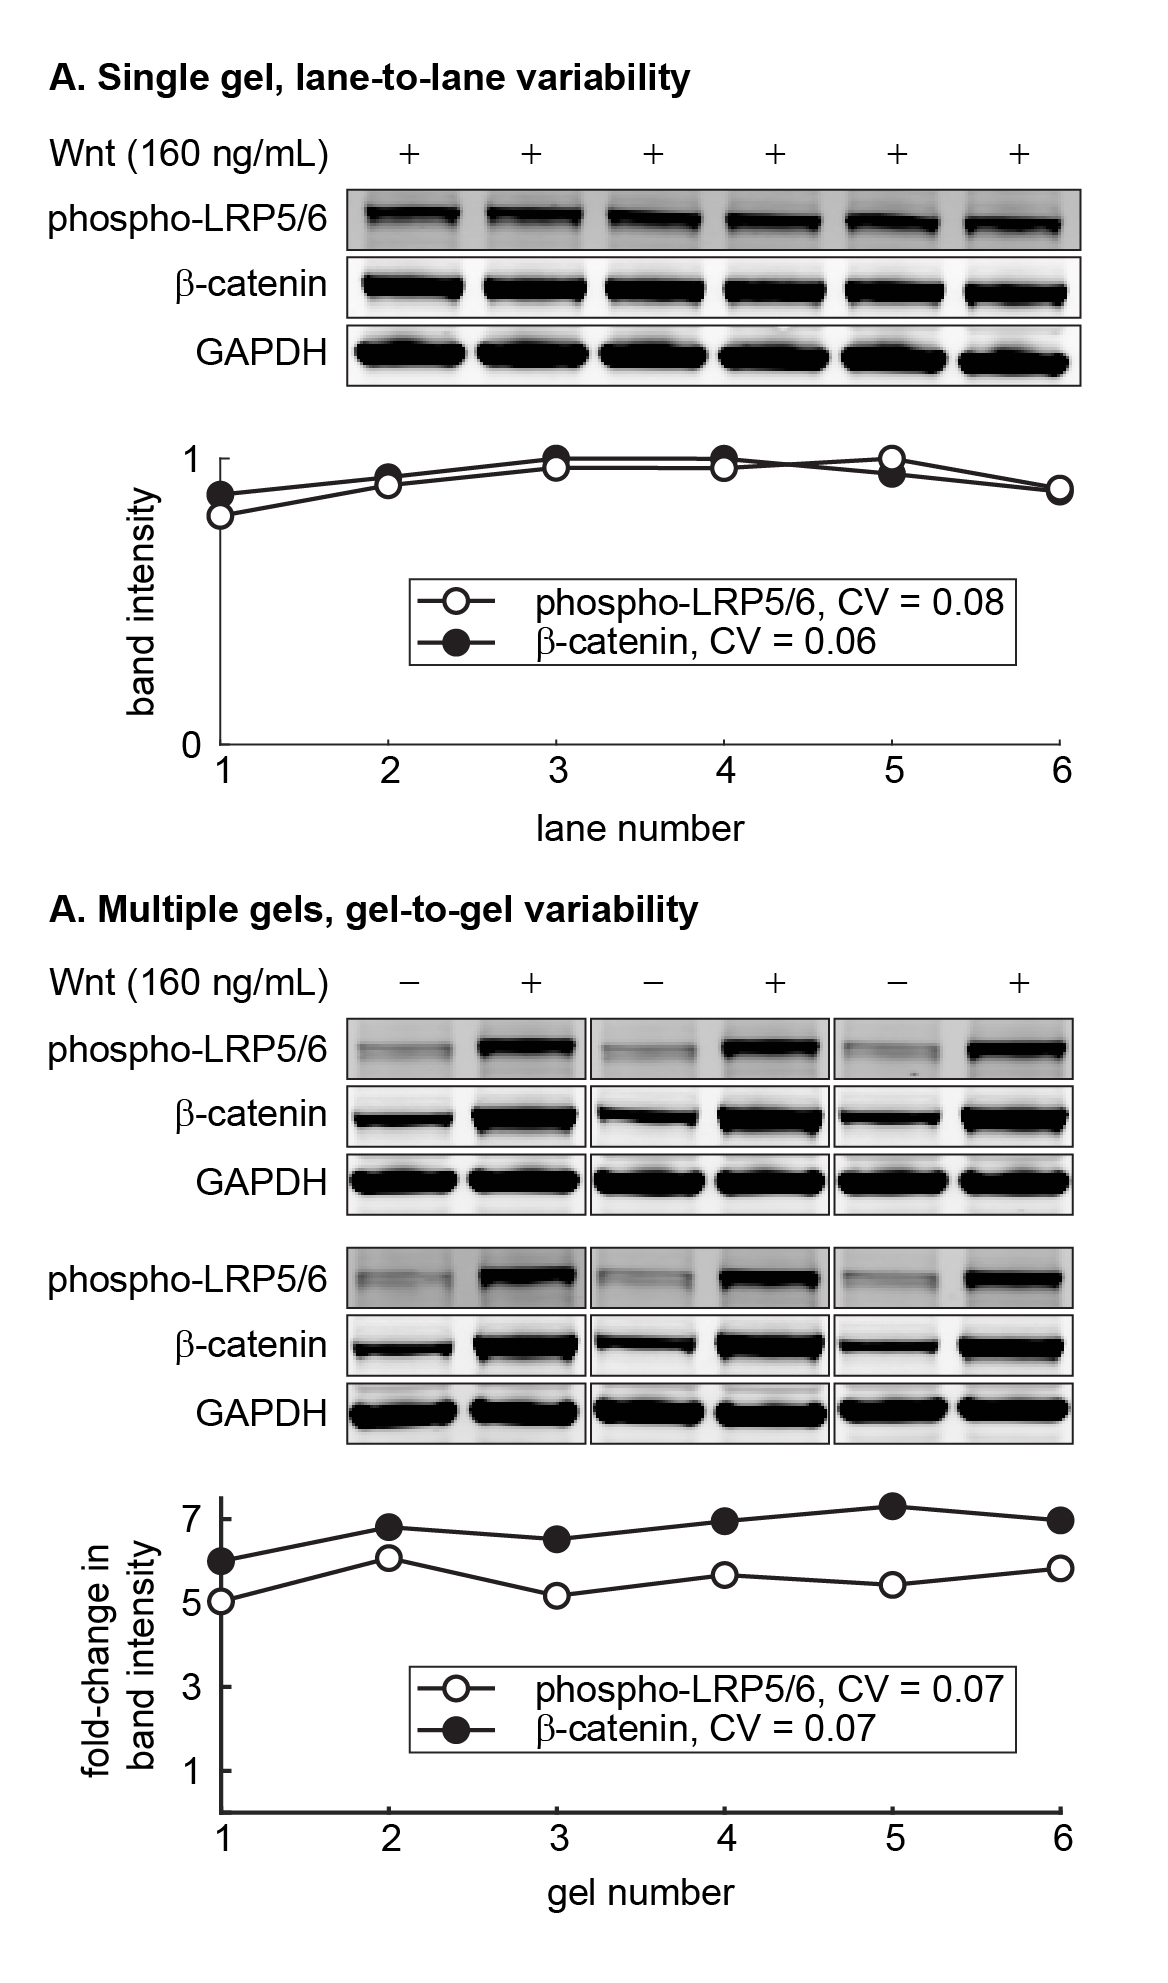

Supplement: supp [file elife-33617-supp-v2.zip › elife_poa_e33617_Figure_3_figure_supplement_7.jpg]

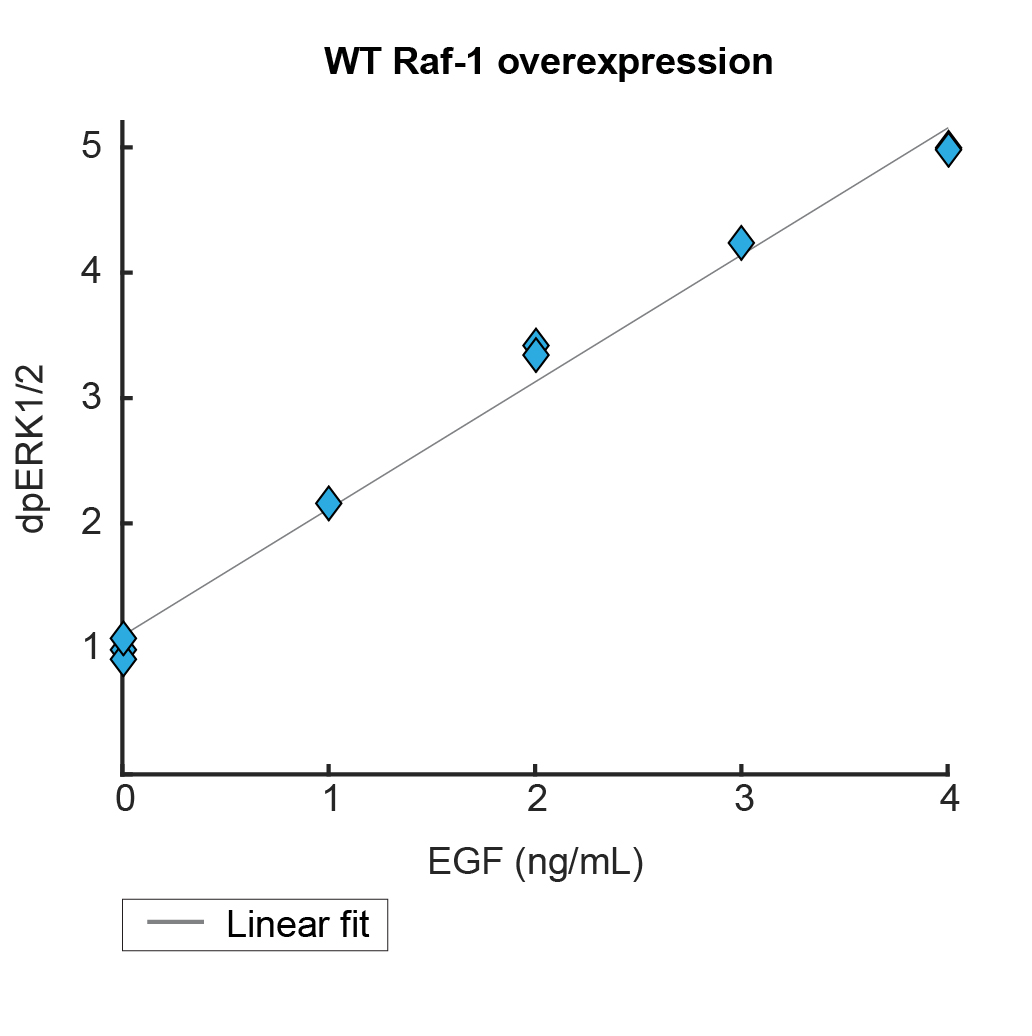

Supplement: supp [file elife-33617-supp-v2.zip › elife_poa_e33617_Figure_3_figure_supplement_5.jpg]

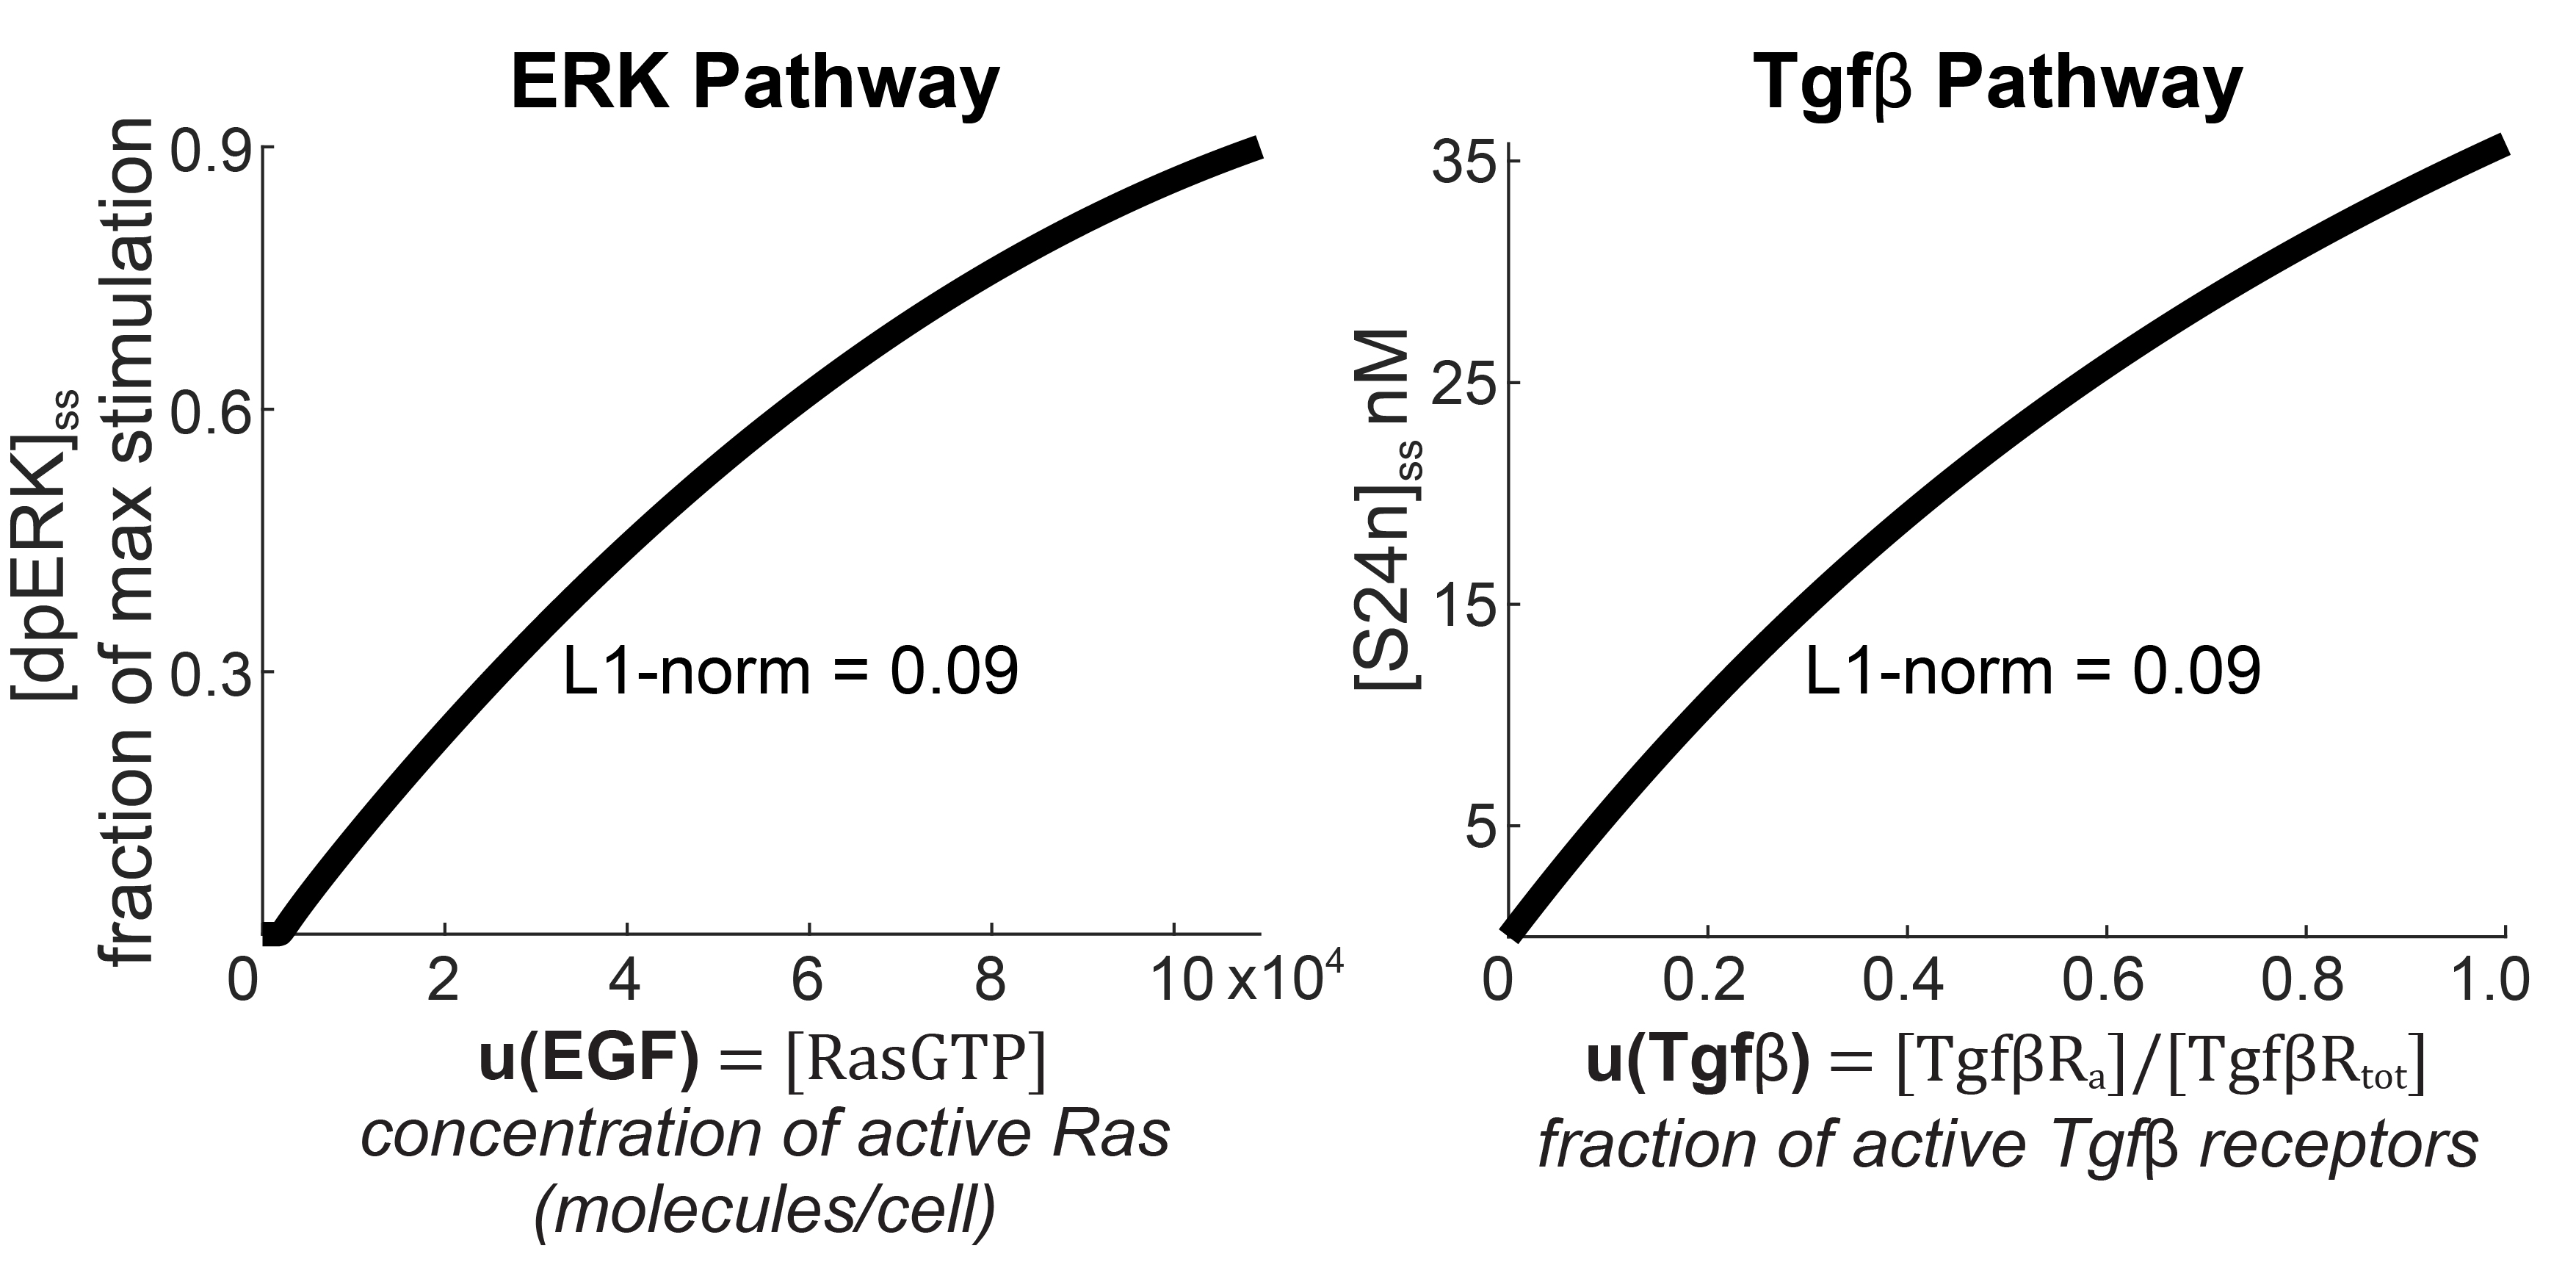

Supplement: supp [file elife-33617-supp-v2.zip › elife_poa_e33617_Figure_2_figure_supplement_2.jpg]
